# Supplementary material for: Efficacy of pragmatic same-day ring prophylaxis for adult individuals exposed to SARS-CoV-2 in Switzerland (COPEP): protocol of an open-label cluster randomised trial
Source: PubMed Central journal article supplement — BMJ Open. 2020 Nov 12;10(11):e040110. doi: 10.1136/bmjopen-2020-040110 (PMC7662450; doi:10.1136/bmjopen-2020-040110), 2020-11-12
Supplement: bmjopen-2020-040110.draft_revisions.pdf [file bmjopen-2020-040110.draft_revisions.pdf]

# BMJ Open

BMJ Open is committed to open peer review. As part of this commitment we make the peer review history of every article we publish publicly available.

When an article is published we post the peer reviewers' comments and the authors' responses online. We also post the versions of the paper that were used during peer review. These are the versions that the peer review comments apply to.

The versions of the paper that follow are the versions that were submitted during the peer review process. They are not the versions of record or the final published versions. They should not be cited or distributed as the published version of this manuscript.

BMJ Open is an open access journal and the full, final, typeset and author-corrected version of record of the manuscript is available on our site with no access controls, subscription charges or pay-per-view fees (<http://bmjopen.bmj.com>).

If you have any questions on BMJ Open's open peer review process please email [info.bmjopen@bmj.com](mailto:info.bmjopen@bmj.com)

# BMJ Open

## Efficacy of pragmatic same-day ring prophylaxis for adult individuals exposed to SARS-CoV-2 in Switzerland (COPEP): protocol of an open-label cluster randomized trial

|                               |                                                                                                                                                                                                                                                                                                                                                                                                                                                                                                                                                                                                                                                                                                                                                                                                                                                                                                                                                                                                                                                                                                                                                                                                                                                                                                                                                                                                                                                                                                                                                                                                                                                                                                                                                                                                                                                                                                                                                                                                                                                                                                                                                      |
|-------------------------------|------------------------------------------------------------------------------------------------------------------------------------------------------------------------------------------------------------------------------------------------------------------------------------------------------------------------------------------------------------------------------------------------------------------------------------------------------------------------------------------------------------------------------------------------------------------------------------------------------------------------------------------------------------------------------------------------------------------------------------------------------------------------------------------------------------------------------------------------------------------------------------------------------------------------------------------------------------------------------------------------------------------------------------------------------------------------------------------------------------------------------------------------------------------------------------------------------------------------------------------------------------------------------------------------------------------------------------------------------------------------------------------------------------------------------------------------------------------------------------------------------------------------------------------------------------------------------------------------------------------------------------------------------------------------------------------------------------------------------------------------------------------------------------------------------------------------------------------------------------------------------------------------------------------------------------------------------------------------------------------------------------------------------------------------------------------------------------------------------------------------------------------------------|
| Journal:                      | <i>BMJ Open</i>                                                                                                                                                                                                                                                                                                                                                                                                                                                                                                                                                                                                                                                                                                                                                                                                                                                                                                                                                                                                                                                                                                                                                                                                                                                                                                                                                                                                                                                                                                                                                                                                                                                                                                                                                                                                                                                                                                                                                                                                                                                                                                                                      |
| Manuscript ID                 | bmjopen-2020-040110                                                                                                                                                                                                                                                                                                                                                                                                                                                                                                                                                                                                                                                                                                                                                                                                                                                                                                                                                                                                                                                                                                                                                                                                                                                                                                                                                                                                                                                                                                                                                                                                                                                                                                                                                                                                                                                                                                                                                                                                                                                                                                                                  |
| Article Type:                 | Protocol                                                                                                                                                                                                                                                                                                                                                                                                                                                                                                                                                                                                                                                                                                                                                                                                                                                                                                                                                                                                                                                                                                                                                                                                                                                                                                                                                                                                                                                                                                                                                                                                                                                                                                                                                                                                                                                                                                                                                                                                                                                                                                                                             |
| Date Submitted by the Author: | 07-May-2020                                                                                                                                                                                                                                                                                                                                                                                                                                                                                                                                                                                                                                                                                                                                                                                                                                                                                                                                                                                                                                                                                                                                                                                                                                                                                                                                                                                                                                                                                                                                                                                                                                                                                                                                                                                                                                                                                                                                                                                                                                                                                                                                          |
| Complete List of Authors:     | <p>Smit, Mikaela; Geneva University Hospitals, HIV Unit; University of Geneva, Faculty of Medicine</p> <p>Marinosci, Annalisa; Hopitaux Universitaires de Geneve, HIV Unit</p> <p>Nicoletti, Giovanni; Swiss Tropical and Public Health Institute, Department of Medicine</p> <p>Perneger, Thomas; Hopitaux Universitaires de Geneve, Division of clinical epidemiology; University of Geneva, Faculty of Medicine</p> <p>Ragozzino, Silvio; University of Basel, Department of Infectious Diseases and Hospital Epidemiology</p> <p>Andrey, Diego; Hopitaux Universitaires de Geneve, HIV Unit; University of Geneva, Faculty of Medicine</p> <p>Stoeckle, Marcel; University of Basel, Department of Infectious Diseases and Hospital Epidemiology</p> <p>Jacquierioz, Frederique; Hopitaux Universitaires de Geneve, Department of Primary Care</p> <p>Lebowitz, Dan; Hopitaux Universitaires de Geneve, Infection Control Programme; Republique et Canton de Geneve, Direction Geneale de la Sante</p> <p>Agoritsas, Thomas; Hopitaux Universitaires de Geneve, Faculty of Medicine; University of Geneva, Departement of Medicine</p> <p>Meyer, Benjamin; University of Geneva, Department of Pathology and Immunology,</p> <p>Spechbach, Herve; Hopitaux Universitaires de Geneve, Department of Primary Care</p> <p>Salamun, Julien; Hopitaux Universitaires de Geneve, Department of Primary Care</p> <p>Back, Moritz; Canton of Basel City, Gesundheitsdepartement</p> <p>Schaubhut, Carla; Canton of Basel City, Gesundheitsdepartement</p> <p>Fuchs, Simon; Canton of Basel City, Gesundheitsdepartement</p> <p>Decosterd, Laurent; University of Lausanne, Laboratory of Clinical Pharmacology</p> <p>Battegay, Manuel; University of Basel, Department of Infectious Diseases and Hospital Epidemiology</p> <p>Guessous, Idris; Hopitaux Universitaires de Geneve, Department of Primary Care</p> <p>Chappuis, François; Hopitaux Universitaires de Geneve, Department of Primary Care</p> <p>Kaiser, Laurent; Hopitaux Universitaires de Geneve, Division of Infectious Diseases; Hopitaux Universitaires de Geneve, Geneva Centre</p> |

1  
2  
3  
4  
5  
6  
7  
8  
9  
10  
11  
12  
13  
14  
15  
16  
17  
18  
19  
20  
21  
22  
23  
24  
25  
26  
27  
28  
29  
30  
31  
32  
33  
34  
35  
36  
37  
38  
39  
40  
41  
42  
43  
44  
45  
46  
47  
48  
49  
50  
51  
52  
53  
54  
55  
56  
57  
58  
59  
60

|           |                                                                                                                                                                                                                                                                                                                                      |
|-----------|--------------------------------------------------------------------------------------------------------------------------------------------------------------------------------------------------------------------------------------------------------------------------------------------------------------------------------------|
|           | for Emerging Viral Diseases Geneva<br>Labhardt, Niklaus; Swiss Tropical and Public Health Institute,<br>Department of Medicine, ; University of Basel, Department of Infectious<br>Diseases and Hospital Epidemiology<br>Calmy, Alexandra; Hopitaux Universitaires de Geneve, HIV Unit;<br>University of Geneva, Faculty of Medicine |
| Keywords: | INFECTIOUS DISEASES, Epidemiology < INFECTIOUS DISEASES,<br>PREVENTIVE MEDICINE, Clinical trials < THERAPEUTICS                                                                                                                                                                                                                      |
|           |                                                                                                                                                                                                                                                                                                                                      |

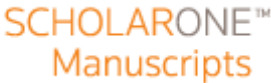

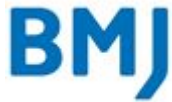

I, the Submitting Author has the right to grant and does grant on behalf of all authors of the Work (as defined in the below author licence), an exclusive licence and/or a non-exclusive licence for contributions from authors who are: i) UK Crown employees; ii) where BMJ has agreed a CC-BY licence shall apply, and/or iii) in accordance with the terms applicable for US Federal Government officers or employees acting as part of their official duties; on a worldwide, perpetual, irrevocable, royalty-free basis to BMJ Publishing Group Ltd ("BMJ") its licensees and where the relevant Journal is co-owned by BMJ to the co-owners of the Journal, to publish the Work in this journal and any other BMJ products and to exploit all rights, as set out in our [licence](#).

The Submitting Author accepts and understands that any supply made under these terms is made by BMJ to the Submitting Author unless you are acting as an employee on behalf of your employer or a postgraduate student of an affiliated institution which is paying any applicable article publishing charge ("APC") for Open Access articles. Where the Submitting Author wishes to make the Work available on an Open Access basis (and intends to pay the relevant APC), the terms of reuse of such Open Access shall be governed by a Creative Commons licence – details of these licences and which [Creative Commons](#) licence will apply to this Work are set out in our licence referred to above.

Other than as permitted in any relevant BMJ Author's Self Archiving Policies, I confirm this Work has not been accepted for publication elsewhere, is not being considered for publication elsewhere and does not duplicate material already published. I confirm all authors consent to publication of this Work and authorise the granting of this licence.

1  
2  
3 1 **Efficacy of pragmatic same-day ring prophylaxis for adult individuals exposed to**  
4  
5 2 **SARS-CoV-2 in Switzerland (COPEP): protocol of an open-label cluster randomized**  
6  
7 3 **trial**  
8  
9 4

10  
11 5 Mikaela SMIT<sup>1,2,3</sup>, Annalisa MARINOSCI<sup>1</sup>, Giovanni Jacopo NICOLETTI<sup>4</sup>, Thomas  
12  
13 6 PERNEGER<sup>2,5</sup>, Silvio RAGOZZINO<sup>6</sup>, Diego O ANDREY<sup>1,2,7</sup>, Marcel P STOECKLE<sup>6</sup>,  
14  
15 7 Frédérique JACQUERIOZ<sup>8</sup>, Dan LEBOWITZ<sup>9,10</sup>, Thomas AGORITSAS<sup>2,11,12</sup>, Benjamin  
16  
17 8 MEYER<sup>13</sup>, Hervé SPECHBACH<sup>8</sup>, Julien SALAMUN<sup>8</sup>, Moritz BACK<sup>14</sup>, Carla SCHAUBHUT<sup>14</sup>,  
18  
19 9 Simon FUCHS<sup>14</sup>, Laurent DECOSTERD<sup>15</sup>, Manuel BATTEGAY<sup>6</sup>, Idris GUESSOUS<sup>8</sup>,  
20  
21 10 Francois CHAPPUIS<sup>8</sup>, Laurent KAISER<sup>16,17</sup>, Niklaus D LABHARDT<sup>4,6</sup>, Alexandra CALMY<sup>1,2</sup>  
22  
23  
24 11

25  
26 12 From: <sup>1</sup>HIV Unit, Geneva University Hospitals, Switzerland; <sup>2</sup>Faculty of Medicine, University  
27  
28 13 of Geneva, Switzerland; <sup>3</sup>Department of Infectious Disease Epidemiology, Imperial College,  
29  
30 14 Faculty of Medicine, London, UK; <sup>4</sup>Department of Medicine, Swiss Tropical and Public  
31  
32 15 Health Institute, Switzerland; <sup>5</sup>Division of Clinical Epidemiology, Geneva University  
33  
34 16 Hospitals, Switzerland; <sup>6</sup>Department of Infectious Diseases and Hospital Epidemiology,  
35  
36 17 University Hospital of Basel, Switzerland; <sup>7</sup>Division of Laboratory Medicine, Diagnostic  
37  
38 18 Department, Geneva University Hospitals, Switzerland; <sup>8</sup>Department of Primary Care,  
39  
40 19 Geneva University Hospitals, Switzerland; <sup>9</sup>Infection Control Programme, Geneva University  
41  
42 20 Hospitals, Switzerland; <sup>10</sup>Direction Générale de la Santé, Canton de Genève, Switzerland;  
43  
44 21 <sup>11</sup>Département de Médecine, Geneva University Hospitals, Switzerland; <sup>12</sup>Département of  
45  
46 22 Health Research Methods, Evidence, and Impact, Hamilton, Ontario, Canada; <sup>13</sup>Centre for  
47  
48 23 Vaccinology, Department of Pathology and Immunology, University of Geneva, Switzerland,  
49  
50 24 <sup>14</sup>Gesundheitsdepartement des Kantons Basel-Stadt; <sup>15</sup>Laboratory of Clinical Pharmacology,  
51  
52 25 Lausanne University Hospital, Switzerland; <sup>16</sup>Division of Infectious Diseases, Geneva  
53  
54 26 University Hospitals, Switzerland; <sup>17</sup>Geneva Centre for Emerging Viral Diseases Geneva  
55  
56 27 University Hospitals, Switzerland.  
57  
58  
59  
60 28

1  
2  
3 29 **Keywords:** COVID-19; SARS-CoV-2, prophylaxis; cluster randomized trial;  
4  
5 30 hydroxychloroquine; lopinavir  
6

7 31

8  
9 32 **Running title:** COPEP trial  
10

11 33

12  
13 34 **Word count:** 2,621  
14

15 35 **Corresponding author:**

16  
17 36 Dr Mikaela Smit, <sup>1</sup>HIV Unit, Geneva University Hospitals, Switzerland.  
18

19  
20 37 Email: [Mikaela.smit@hcuge.ch](mailto:Mikaela.smit@hcuge.ch)  
21

22 38

23  
24 39 **40 Word Summary:**

25  
26 40 COPEP is a three-arm cluster randomized open-label clinical trial to test the efficacy of  
27

28 41 hydroxychloroquine and of lopinavir/ritonavir versus the standard of care as post-exposure  
29

30 42 ring prophylaxis for adults exposed to SARS-CoV-2.  
31  
32  
33  
34  
35  
36  
37  
38  
39  
40  
41  
42  
43  
44  
45  
46  
47  
48  
49  
50  
51  
52  
53  
54  
55  
56  
57  
58  
59  
60

1  
2  
3 **43 Abstract**

4  
5 **44 Introduction**

6  
7 45 Hydroxychloroquine (HCQ) and lopinavir/ritonavir (LPV/r) have both been proposed as  
8  
9 46 repurposed for pre- and post-exposure prophylaxis as well as therapy of Coronavirus  
10  
11 47 Disease (COVID-19). COPEP trial aims at assessing their efficacy as post-exposure ring-  
12  
13 48 prophylaxis among adults exposed to severe acute respiratory syndrome coronavirus 2  
14  
15 49 (SARS-CoV-2).

16  
17  
18 **50 Methods and Analysis**

19  
20 51 COPEP is a three-arm open-label cluster-randomized trial conducted in two cantons of  
21  
22 52 Switzerland. Asymptomatic adult ( $\geq 18$  years) contacts of individuals diagnosed with COVID-  
23  
24 53 19 will be randomized (1:1:1) to: a single-dose hydroxychloroquine (HCQ) 800mg,  
25  
26 54 lopinavir/ritonavir (LPV/r) (400mg/100mg twice daily) for 5 days, or a standard of care arm  
27  
28 55 (no treatment). Contacts living in the single household will form a cluster and will be  
29  
30 56 randomized into the same arm. All participants will be followed-up for 21 days and undergo  
31  
32 57 daily monitoring for COVID-19 symptoms. The primary endpoint is 21-day incidence of  
33  
34 58 COVID-19, analyzed in an intention-to-treat (ITT) analysis. The secondary endpoints include  
35  
36 59 the 21-day incidence of COVID-19 as well as SARS-CoV-2 infection in a modified ITT  
37  
38 60 analysis, excluding participants who had a positive SARS-CoV-2 RT-PCR (polymerase  
39  
40 61 chain reaction) from oropharyngeal swab and/or a positive SARS-CoV-2 IgG serology at  
41  
42 62 baseline. Assuming a 21-day incidence for COVID-19 of 20% among contacts without post-  
43  
44 63 exposure chemoprophylaxis, to detect a relative risk reduction of 60% (i.e. translating in an  
45  
46 64 absolute reduction from 20% to 8%), with a power of 80%, an alpha of 5%. Accounting for  
47  
48 65 design effect of cluster design of circa 1.1, we plan to enroll 140 participants per arm, 420  
49  
50 66 participants in total.

51  
52  
53 **67 Ethics and Dissemination** Ethics approval has been granted by the Commission cantonale  
54  
55 68 d'éthique de la recherche and Ethikkommission Nordwest- und Zentralschweiz (ref 2020-  
56  
57 69 00864) and Swissmedic (2020DR3056). Results from this trial will be disseminated via  
58  
59 70 journal articles and presentations at national and international conferences.

1  
2  
3 71  
4

5 72 **Trial registration:** Clinicaltrials.gov (NCT04364022); Swiss National Clinical Trial Portal

6  
7 73 (SNCTP 000003732)  
8

9 74 **Registered Report Identifier:** CCER 2020-0864

10  
11 75  
12  
13  
14  
15  
16  
17  
18  
19  
20  
21  
22  
23  
24  
25  
26  
27  
28  
29  
30  
31  
32  
33  
34  
35  
36  
37  
38  
39  
40  
41  
42  
43  
44  
45  
46  
47  
48  
49  
50  
51  
52  
53  
54  
55  
56  
57  
58  
59  
60

For peer review only



1  
2  
3 76 **Strengths and Limitations:**  
4

- 5 77 - Amongst the first clinical trials to study two prophylactic candidates for COVID-19 in  
6  
7 78 the general population as well as health care workers.  
8  
9 79 - The trial will test pragmatic ring prophylactic strategies that can be prescribed the  
10  
11 80 same day with minimal clinical and laboratory assessment  
12  
13  
14 81 - Recruitment may be slowed down by the evolution of the epidemic.  
15

16 82  
17  
18  
19  
20  
21  
22  
23  
24  
25  
26  
27  
28  
29  
30  
31  
32  
33  
34  
35  
36  
37  
38  
39  
40  
41  
42  
43  
44  
45  
46  
47  
48  
49  
50  
51  
52  
53  
54  
55  
56  
57  
58  
59  
60

For peer review only

## 83 Introduction

84 Since the beginning of the Severe Acute Respiratory Syndrome coronavirus 2 (SARS-CoV-2)  
85 outbreak in December 2019, the medical and scientific community has scrambled to identify  
86 effective pharmacological candidates for its prevention and treatment. Coronavirus Disease-  
87 19 (COVID-19, which is the clinical manifestation of SARS-CoV-2 infection) has caused  
88 unprecedented pressure on modern health systems across the world. The sudden and  
89 uncontrolled influx of severe COVID-19 cases has caused critical shortage of hospital-based  
90 resources and forced many countries into lockdown in early 2020.

91 Containing the COVID-19 pandemic may necessitate a multi-pronged strategy,  
92 including immunization, treatment, and prophylaxis. The latter would facilitate the containment  
93 of future outbreaks of the disease in non-immunized populations. This current pandemic wave  
94 will likely be followed by subsequent outbreaks and authorities will need to consider less strict  
95 isolation measures when apprising multiple economic impacts (including on health-related  
96 outcome) over a prolonged period of time.

97 Two drugs have been identified as possible prophylactic candidates;  
98 hydroxychloroquine (HCQ), an anti-malarial drug<sup>1</sup> and the protease inhibitors  
99 lopinavir/ritonavir (LPV/r) used for the treatment of HIV.<sup>2,3</sup> HCQ acts as an endosomal  
100 acidification fusion inhibitor and thus may blocks, at least *in vitro*, viral entry into the host cell.<sup>4</sup>  
101 Protease inhibitors work by preventing viral replication and LPV/r has been shown to bind to  
102 active site of the SARS-CoV protease *in vitro*, with studies confirming that the spatial structure  
103 of the binding site was conserved between SARS-CoV and SARS-CoV-2.<sup>5-7</sup> Both drugs are  
104 licensed in most countries, are part of the World Health Organization essential list, and are  
105 available globally and at low cost.<sup>8</sup>

106 However, to date there are no published randomized studies assessing the efficacy of  
107 HCQ or LPV/r as prophylaxis for COVID-19. COPEP is a Swiss three-arm open-label cluster  
108 randomized trial that will assess the efficacy, safety and acceptability of same-day HCQ-and  
109 LPV/r-based prophylaxis, compared to standard of care alone (no treatment) for asymptomatic  
110 individuals exposed to SARS-CoV-2.

## 111 **Methods**

112 COPEP is an open-label three-arm (1:1:1) cluster randomized superiority trial to assess  
113 efficacy, safety and acceptability of same-day HCQ-prophylaxis and same-day LPV/r-  
114 prophylaxis versus standard of care (no treatment) for asymptomatic adult individuals exposed  
115 to SARS-CoV-2. The study will be performed at two sites in Switzerland, Geneva and Basel,  
116 and seeks to recruit 420 participants over four to six months. The main objective of COPEP is  
117 to assess prevention of COVID-19, with secondary objectives including preventing of SARS-  
118 COV-2 infection, and attenuation of COVID-19 severity.

## 120 **Participants**

121 This trial enrolls adult individuals ( $\geq 18$  years) who have come into close contact with a  
122 confirmed case of SARS-CoV-2 infection. A close contact is defined as a person who spent  
123  $>15$  minutes in  $< 2$  meter distance or shared closed space with a confirmed case for a  
124 prolonged period (e.g. more than 2 hours) in the period extending from 48 hours before onset  
125 of symptoms (or before date of testing in absence of symptoms), or a person who had direct  
126 contact with the body fluids or laboratory specimens of a case without recommended personal  
127 protective equipment (PPE) or in case of failure of PPE.

128 Recruitment of participants to this study will be performed through two routes; i) the  
129 Public Health Authorities in Geneva and Basel, who, as the standard of care, contact all  
130 individuals tested positive for SARS-CoV-2 to provide them with instructions on isolating  
131 procedures and self-monitoring, and ii) health care workers will be recruited via social media  
132 platforms and internal hospital-based platforms. All close contacts of confirmed SARS-CoV-2  
133 positive index case will be screened for eligibility (Table 1).

134

135

136

137

138

139 **Table 1.** Inclusion and exclusion criteria.

| Inclusion Criteria                                                                                                                                                                                                                                               | Exclusion criteria                                                                                                                                                                                                                                                                                                                                                                                                                                                                                                                                                                                                                                                                                                                                                                                                                                                                                                                                                                                                                                                                                                                                                                                                    |
|------------------------------------------------------------------------------------------------------------------------------------------------------------------------------------------------------------------------------------------------------------------|-----------------------------------------------------------------------------------------------------------------------------------------------------------------------------------------------------------------------------------------------------------------------------------------------------------------------------------------------------------------------------------------------------------------------------------------------------------------------------------------------------------------------------------------------------------------------------------------------------------------------------------------------------------------------------------------------------------------------------------------------------------------------------------------------------------------------------------------------------------------------------------------------------------------------------------------------------------------------------------------------------------------------------------------------------------------------------------------------------------------------------------------------------------------------------------------------------------------------|
| <ol style="list-style-type: none"> <li>1. Documented close contact with a PCR-confirmed SARS-CoV-2 positive individual within the last 48 hours;</li> <li>2. <math>\geq 18</math> years of age;</li> <li>3. Informed consent documented by signature;</li> </ol> | <ol style="list-style-type: none"> <li>1. Fever (temperature <math>&gt;38.0^{\circ}</math>) and/or respiratory symptoms (cough, dyspnoea) and/or new anosmia/ageusia;</li> <li>2. Individuals with previous confirmed SARS-CoV-2 infection;</li> <li>3. Known impairment of liver function;</li> <li>4. Haemolytic anaemia, porphyria, haemophilia and G6PD deficit; known retinopathy, epilepsy or visual field impairment;</li> <li>5. Individuals with known severe renal impairment (creatinine clearance <math>&lt;30\text{mL/min}</math>) or undergoing dialysis;</li> <li>6. Known hypersensitivity to any of the study medications;</li> <li>7. Known <i>long</i> QT syndrome (LQTS)</li> <li>8. Use of QT interval prolonging medications (<a href="https://crediblemeds.org">https://crediblemeds.org</a>), anti-arrhythmic drugs, or any other medications that are contraindicated with LPV/r and HCQ using the website <a href="http://www.covid19-druginteractions.org">www.covid19-druginteractions.org</a></li> <li>9. Individuals on either HCQ or a boosted protease inhibitor as part of an antiretroviral therapy</li> <li>10. <i>Inability to be followed-up for the trial period</i></li> </ol> |

140 *Abbreviations: G6PD - glucose-6-phosphate dehydrogenase; HCQ – hydroxychloroquine;*  
 141 *LPV/r – lopinavir/ritonavir; LQTS – long QT syndrome; SARS-CoV-2 - severe acute respiratory*  
 142 *syndrome coronavirus 2*

#### 144 **Intervention**

145 Participants will be randomized in household clusters, 1:1:1, to receive either a single dose of  
 146 800 mg of HCQ (4 x 200mg pills); LPV/r, 400mg/100mg (2x 200mg/50mg pills) twice daily for  
 147 5 days; or surveillance. The dose of HCQ and the first dose of LPV/r will be taken during the  
 148 baseline visit, as directly observed therapy.

149

150

151

1  
2  
3 152 **Outcomes**

4  
5 153 Primary Endpoint

6  
7 154 The primary endpoint is the 21-day incidence of COVID-19 in individuals exposed to SARS-  
8  
9 155 CoV-2 who are asymptomatic at baseline. The primary analysis includes all individuals  
10  
11 156 enrolled, irrespective of their baseline oropharyngeal swab results or the baseline SARS-CoV-  
12  
13 157 2 serology (intent-to-treat (ITT) analysis).  
14  
15

16 158

17  
18 159 Secondary endpoints

- 19  
20 160 - 21-day incidence of COVID-19 in individuals exposed to SARS-CoV-2 who are  
21  
22 161 asymptomatic, and have negative SARS-CoV-2 PCR and serology at baseline (modified  
23  
24 162 ITT),  
25  
26 163 - 21-day incidence of SARS-CoV-2 infection in individuals exposed to SARS-CoV-2 who  
27  
28 164 are asymptomatic, and have negative SARS-CoV-2 PCR and serology at baseline  
29  
30 165 (modified ITT)  
31  
32 166 - Severity of clinical COVID-19 on a 7-point ordinal scale  
33  
34 167 - Incidence of serious adverse events.  
35  
36

37 168

38  
39 169 Explorative endpoints include;

- 40  
41 170 i) acceptability of a prophylaxis for COVID-19,  
42  
43 171 ii) reported adherence to LPV/r for participants on the LPV/r arm and HCQ and LPV/r drug  
44  
45 172 levels on day 5 amongst all individuals.  
46  
47

48 173

49  
50 174

51  
52 175 **Measurements**

53  
54 176 The following clinical definitions will be used. COVID-19 is defined as  $\geq 1$  symptom compatible  
55  
56 177 with COVID-19 and either

- 57  
58 178 i) a positive PCR for SARS-CoV-2 in oropharyngeal swab and/or  
59  
60

1  
2  
3 179 ii) a seroconversion of IgG only or IgG and IgA for SARS-CoV-2 at day 21 in individuals with  
4  
5 180 negative serology at baseline. In case of seroconversion of IgA only, seroconversion of IgG  
6  
7 181 using more sensitive spike-based recombination immunofluorescence assay (S-rIFA) will be  
8  
9 182 assessed.

10  
11 183

12  
13 184 New SARS-CoV-2 infection is defined as

14  
15 185 i) a positive PCR for SARS-CoV-2 (oropharyngeal swab) amongst those with a negative PCR  
16  
17 186 at baseline and/or

18  
19 187 ii) a seroconversion of IgG only or IgG and IgA for SARS-CoV-2 at day 21 in individuals with  
20  
21 188 negative serology at baseline. In case of seroconversion of IgA only, seroconversion of IgG  
22  
23 189 using more sensitive S-rIFA will be used.

24  
25 190

26  
27 191 Seroconversion for SARS-CoV-2 is defined as negative results for IgG in ELISA at baseline  
28  
29 192 and either

30  
31 193 i) positive result for IgG in ELISA and confirmation by S-rIFA at day 21 or

32  
33 194 ii) doubtful result for IgG in ELISA at day 21 and confirmation by S-rIFA. In case of negative  
34  
35 195 result for IgG in ELISA at day 21 seroconversion can alternatively be defined as follows:

36  
37 196 Negative result of IgA in ELISA at baseline and i) positive or doubtful result for IgA in ELISA  
38  
39 197 at day 21 and ii) positive result for IgG in S-rIFA at day 21.

40  
41 198

## 42 43 199 **Procedures**

44  
45 200 All participants will be followed-up for 21 days (Fig 1 and Table 2). Participants will undergo  
46  
47 201 an oropharyngeal swab for SARS-CoV-2 PCR and a SARS-CoV-2 serology at baseline and  
48  
49 202 on Day 21. In addition, all participants will be asked to provide on day 5 a capillary puncture  
50  
51 203 on dried blood spot (DBS) to assess blood levels of HCQ and LPV/r. Participants will be given  
52  
53 204 the option of “self-test”, or of a home-visit for this DBS procedure.

54  
55 205

56  
57  
58  
59  
60

1  
2  
3 206 During follow-up, individuals will be asked to complete a daily online COVID-19 symptoms  
4  
5 207 questionnaire. The online questionnaire generates alerts when individuals report a symptom  
6  
7 208 associated with COVID-19 and if participants do not complete the questionnaire for 2  
8  
9 209 consecutive days. The online questionnaire also serves as a reminder for those on the LPV/r  
10  
11 210 arm, to take their daily medication up to Day 5. Paper questionnaires will be made available  
12  
13 211 for those without access to internet. All questionnaires are available in several languages.  
14  
15

16 212

17  
18 213 The team will contact the participant in case an alert is triggered and do a first clinical  
19  
20 214 assessment by phone. Participants who report COVID-related symptoms (e.g. dyspnoea,  
21  
22 215 cough, fever (>38.0C), anosmia) will be asked to come on site for an extra visit and undergo  
23  
24 216 clinical assessment and an oropharyngeal swab to confirm/exclude SARS-CoV-2 infection. If  
25  
26 217 found positive, participants will be provided with appropriate care, as per local protocol. A  
27  
28 218 follow-up visit 14 days after a positive diagnosis will be conducted, in order to establish the  
29  
30 219 worst clinical manifestation of disease.  
31

32 220

33  
34  
35 221 On Day 21, participants will further complete a questionnaire on adverse events and  
36  
37 222 acceptability of the treatment.  
38

39 223

#### 40 41 224 **Sample size**

42  
43 225 The sample size for the primary endpoint assumes that without treatment 20% of close  
44  
45 226 contacts will develop COVID-19, based on the clinical observations made by the team. To  
46  
47 227 detect a relative risk reduction of 60% (i.e. translating in an absolute reduction from 20% to  
48  
49 228 8%), with a power of 80%, an alpha of 5% and accounting for design effect of cluster design  
50  
51 229 of circa 1.1 (based on  $= (n - 1)\rho + 1$ , where  $n=3$  denotes the average cluster size, and  
52  
53 230  $\rho=0.05$  is the assumed intraclass correlation coefficient). A sample size of 140 participants in  
54  
55 231 each per arm, 420 in total will thus be needed.  
56

57 232

58  
59  
60

1  
2  
3 233 For the first of the secondary endpoint (occurrence of new SARS-CoV-2 infection) we assume  
4  
5 234 40% of close contact without prophylaxis will become infected and 16% with prophylaxis; but  
6  
7 235 we also expect a baseline prevalence of positive PCR of 30% (these participants will be  
8  
9 236 excluded from this analysis in a modified ITT). With an effective sample size of 98 individuals  
10  
11 237 per arm ( $140 \times 0.7$ ) the power will be 95% for this endpoint.  
12

13  
14 238

### 15 239 **Randomization and blinding**

16  
17  
18 240 Randomization will be done in variable-sized blocks (sizes 6 or 9) in random sequence,  
19  
20 241 stratified by site (Geneva and Basel). Randomization will be done by cluster, that is where  
21  
22 242 close contacts reside in the same household (for example the family or friends of the index  
23  
24 243 case that live together). The randomization procedure will consist of sealed envelopes, one  
25  
26 244 for each household cluster, prepared by individuals who are not associated with the  
27  
28 245 recruitment for the trial. Treatment will be identical within households because of the risk of  
29  
30 246 cross-contamination and to simplify treatment administration to individuals in the same  
31  
32 247 household. This is an open-label trial.  
33

34  
35 248

### 36 249 **Statistical analysis**

37  
38  
39 250 For the analysis of the primary endpoint, 21-day incidence of COVID-19, we will perform an  
40  
41 251 intention to treat analysis (ITT), including all individuals who were randomized (including those  
42  
43 252 who will retrospectively be found to be PCR-confirmed SARS-CoV-2 positive at baseline as  
44  
45 253 well as individuals retrospectively found SARS-CoV-2 seropositive by serology).  
46

47  
48 254

49  
50 255 Both intervention arms, HCQ and LPV/r, will be compared to the surveillance arm, using  
51  
52 256 separate indicator variables for the active treatment arms. Because the hypotheses about  
53  
54 257 treatment efficacy are unrelated and independent, and because we will focus on estimation  
55  
56 258 and confidence intervals rather than on statistical tests, no adjustment will be done for  
57  
58 259 multiplicity. Since individual observations will be clustered within households (randomization  
59  
60 260 units), themselves nested within index cases, we will use mixed complementary log-log



1  
2  
3 261 regression models for the main analysis (complementary log-log regression is similar to  
4  
5 262 logistic regression, but yields relative hazards, rather than odds ratios; relative hazards are  
6  
7 263 more readily interpretable in the context of disease incidence). The outcome variable will be  
8  
9 264 the occurrence of COVID-19 by day 21. A random intercept will be defined by each household,  
10  
11 265 nested within the index case. The main fixed effect will be treatment (separate indicators for  
12  
13 266 HCQ versus surveillance, and LPV/r versus surveillance). The main statistical model will be  
14  
15 267 adjusted for potential confounding variables, guided by the most up to date evidence. We  
16  
17 268 foresee that for the incidence of COVID-19, adjustment variables are: age, presence of  
18  
19 269 comorbidities (specifically cardiac, liver or pulmonary disease), treatment of the index case,  
20  
21 270 occupational versus non-occupational exposure, and/or positive serology.  
22  
23  
24 271

25  
26 272 In a modified intent to treat analysis we will evaluate the secondary endpoints; i) 21-day  
27  
28 273 incidence of COVID-19 in individuals exposed to SARS-CoV-2 who are asymptomatic, PCR-  
29  
30 274 confirmed SARS-CoV-2 negative and have negative SARS-CoV-2 serology at baseline  
31  
32 275 (modified ITT), ii) 21-day incidence of SARS-CoV-2 infection in individuals exposed to SARS-  
33  
34 276 CoV-2 who are asymptomatic, PCR-confirmed SARS-CoV-2 negative and have negative  
35  
36 277 SARS-CoV-2 serology at baseline (modified ITT)  
37  
38

39 278  
40  
41 279 To ensure that the adjustment model is identical for the two treatment effects, we will run a  
42  
43 280 single model including all participants, with separate indicators for treatments. The output will  
44  
45 281 be an adjusted relative hazard of each treatment effect versus surveillance, with a 95%  
46  
47 282 confidence interval.  
48

49 283  
50  
51 284 For the secondary outcome "severity of disease", rated on a 7-point scale, we will use a Mann-  
52  
53 285 Whitney test to compare this ordinal outcome variable between intervention arms and  
54  
55 286 surveillance. For the analysis of individual-reported adverse events, the population will include  
56  
57 287 all randomized participants, and the comparisons will be by cross-tabulations and chi-square  
58  
59 288 tests, since the probability of experiencing adverse events will likely not be affected by

289 clustering. For the analysis of acceptability/compliance, only the 2 intervention arms will be  
 290 compared. We will use R software version 1.2.5019 and Stata software version 16 for the  
 291 analysis.

292

### 293 **Data collection and management**

294 Any data collected during the course of this study will be protected under secure password,  
 295 or kept under lock and key in the research office. No records bearing patient identification will  
 296 be provided to anyone outside of the institution except regulatory agencies. Patients will not  
 297 be identifiable as individuals in any publication or presentation of this study. Data will be  
 298 recorded in RedCap and analysed as described above. The trial will follow all standard  
 299 procedures, including reporting of adverse events. The protocol was written in accordance  
 300 with SPIRIT checklist (Appendix 1)

301

### 302 **Patient and public involvement**

303 No patient or patient advisor was involved with study design, recruitment or conduct.

304

305 **Table 2.** SPIRIT table.

|                                                            | Screening      | Baseline:<br>Day 0 | Day 1-21<br>(Daily self-<br>assessment)<br>Participant's<br>home | Day 5 <sup>9</sup> | Day 21  |
|------------------------------------------------------------|----------------|--------------------|------------------------------------------------------------------|--------------------|---------|
|                                                            | Phone          | On-site            |                                                                  |                    | On-site |
| <b>Informed consent procedure</b>                          | X <sup>1</sup> | X <sup>3</sup>     |                                                                  |                    |         |
| <b>Eligibility check; inclusion and exclusion criteria</b> | X <sup>2</sup> | X <sup>4</sup>     |                                                                  |                    |         |
| <b>Oropharyngeal swab</b>                                  |                | X                  | Prompted by COVID-19 compatible symptoms <sup>5</sup>            |                    | X       |
| <b>Laboratory-based serology</b>                           |                | X                  |                                                                  |                    | X       |
| <b>Randomization</b>                                       |                | X                  |                                                                  |                    |         |
| <b>Administration of prophylaxis<sup>6</sup></b>           |                | X                  | X <sup>7</sup>                                                   |                    |         |

|                                                                                                                                                                                                                                                                                          |  |  |                  |   |   |
|------------------------------------------------------------------------------------------------------------------------------------------------------------------------------------------------------------------------------------------------------------------------------------------|--|--|------------------|---|---|
| <b>Daily Self-assessment</b>                                                                                                                                                                                                                                                             |  |  | X                |   |   |
| <b>Questionnaire on adherence of intervention<sup>7,8</sup></b>                                                                                                                                                                                                                          |  |  | X <sup>7,8</sup> |   |   |
| <b>Questionnaire on adverse events</b>                                                                                                                                                                                                                                                   |  |  |                  | X | X |
| <b>Dried blood spot collection for blood drug concentration</b>                                                                                                                                                                                                                          |  |  |                  | X |   |
| <b>Questionnaire on acceptability</b>                                                                                                                                                                                                                                                    |  |  |                  |   | X |
| <b>Participants who report COVID-19 symptoms on or prior to day 21;</b> will have on-site visit as soon as possible. An oropharyngeal swab will be performed, and if SARS-CoV-2 is PCR confirmed, participants will undergo a follow-up visit 14 days after symptoms onset. <sup>5</sup> |  |  |                  |   |   |

306

307 <sup>1</sup> Study information will be provided to participants by phone308 <sup>2</sup> Eligibility criteria will be checked with participant by phone309 <sup>3</sup> Informed consent will be signed by participant and medical investigator on site310 <sup>4</sup> Eligibility criteria will be confirmed311 <sup>5</sup> Participants with a positive SARS-CoV-2 swab during follow-up will be provided with appropriate care, as per local protocol312 <sup>6</sup> Only for participants randomized to HCQ or LPV/r, as directly observed therapy313 <sup>7</sup> Only for participants randomized to LPV/r314 <sup>8</sup> Only between baseline and Day 5315 <sup>9</sup>Participants will be given the option of either a self-test DBS, or home visit by a team member

316

317

318

319

320 **Ethics and Dissemination**

321

322 The study has been approved by the following boards: Commission cantonale d'éthique de la  
 323 recherche, Geneva, Switzerland (2020-00864), Ethikkommission Nordwest- und  
 324 Zentralschweiz, Swissmedic (Swiss Agency for Therapeutic Products).

325

326 All participants will be asked for written informed consent with a dedicated member of the  
 327 research team. This trial will be conducted in accordance to Good Clinical Practice and the  
 328 Helsinki Declaration. The WHO Trial Registration Data Set is in online supplementary  
 329 appendix 2.

330

331 The COPEP-trial will establish whether either or both HCQ and LPV/r are effective as post-  
 332 exposure chemoprophylaxis against clinical COVID-19 and / or SARS-CoV-2 infection  
 333 compared to surveillance amongst asymptomatic individuals with recent contact to a person  
 334 infected with SARS-CoV-2. Furthermore, this trial will aim to investigate whether HCQ and /

1  
2  
3 332 or LPV/r reduces the severity of clinical COVID-19 over surveillance alone, and whether these  
4  
5 333 prophylaxes are safe and acceptable for post-exposure prophylaxis of SARS-CoV-2 and  
6  
7 334 COVID-19.

9 335 If effective, such a pragmatic approach with prescription the same day and without waiting  
10  
11 336 for laboratory results, will provide a feasible and relatively low-cost strategy to contain local  
12  
13 337 COVID-19 outbreaks in future. All results will be disseminated in peer-reviewed journals and  
14  
15 338 national and international conferences.

17  
18 339

19  
20 340 **Fig 1.** CONSORT Flow Diagram.

21  
22 341

23  
24 342 **Funding:** Fondation privée des HUG, SNF grant submitted

25  
26 343

27  
28 344 **Role of funding source:** The sponsor of the study had no role in study design, data  
29  
30 345 collection, data analysis, data interpretation, or writing of the report. The corresponding  
31  
32 346 author had full access to all the data in the study and had final responsibility for the decision  
33  
34 347 to submit for publication.

35  
36 348

37  
38 349 **Author Contributions:**

39  
40 350 AC and NL conceived the overall trial, including the overall design and therapeutic  
41  
42 351 candidates and are the PI and Co-PI. AC, NL, MS, TP, MPS, and AM designed the trial,  
43  
44 352 including decision on intervention dosage and administration, study endpoints and  
45  
46 353 procedures. MS and TP developed all statistical aspects of the trial design. DL and SF  
47  
48 354 contributed to the formulation of recruitment via the cantonal health authorities. AM and DA  
49  
50 355 developed the patient and laboratory pathways. BM, LK, and LD helped with all laboratory  
51  
52 356 aspects of the trial design. MS wrote the first draft of this manuscript. All authors contributed  
53  
54 357 to the re-drafting of the manuscript and in the process of approving the final draft.

55  
56 358

57  
58 359 **Conflicts of interest:** We declare that we have no conflicts of interests.

360

361 **Acknowledgements:** The authors thank the funders for supporting this work.

362

### 363 **References**

364 1. Organización Mundial de la Salud. *Guidelines for the treatment of malaria*. (World Health  
365 Organization, 2015).

366 2. European AIDS Clinical Society. *Guidelines*.

367 [http://www.europeanaidsclinicalsociety.org/index.php?option=com\\_content&view=article](http://www.europeanaidsclinicalsociety.org/index.php?option=com_content&view=article)  
368 &id=59&Itemid=41 (2019).

369 3. World Health Organization. WHO | Antiretroviral therapy for HIV infection in adults and  
370 adolescents. <http://www.who.int/hiv/pub/arv/adult/en/index.html>.

371 4. Cortegiani, A., Ingoglia, G., Ippolito, M., Giarratano, A. & Einav, S. A systematic review  
372 on the efficacy and safety of chloroquine for the treatment of COVID-19. *J Crit Care*  
373 (2020) doi:10.1016/j.jcrc.2020.03.005.

374 5. Anand, K. *et al.* Structure of coronavirus main proteinase reveals combination of a  
375 chymotrypsin fold with an extra  $\alpha$ -helical domain. *The EMBO Journal* **21**, 3213–3224  
376 (2002).

377 6. Lin, C.-W. *et al.* Characterization of trans- and cis-cleavage activity of the SARS  
378 coronavirus 3CL<sub>pro</sub> protease: basis for the in vitro screening of anti-SARS drugs. *FEBS*  
379 *Letters* **574**, 131–137 (2004).

380 7. Harrison, C. Coronavirus puts drug repurposing on the fast track. *Nature Biotechnology*  
381 (2020) doi:10.1038/d41587-020-00003-1.

382 8. World Health Organization. WHO | WHO Model Lists of Essential Medicines. *WHO*  
383 <http://www.who.int/medicines/publications/essentialmedicines/en/>.

384

Fig 1. CONSORT Flow Diagram.

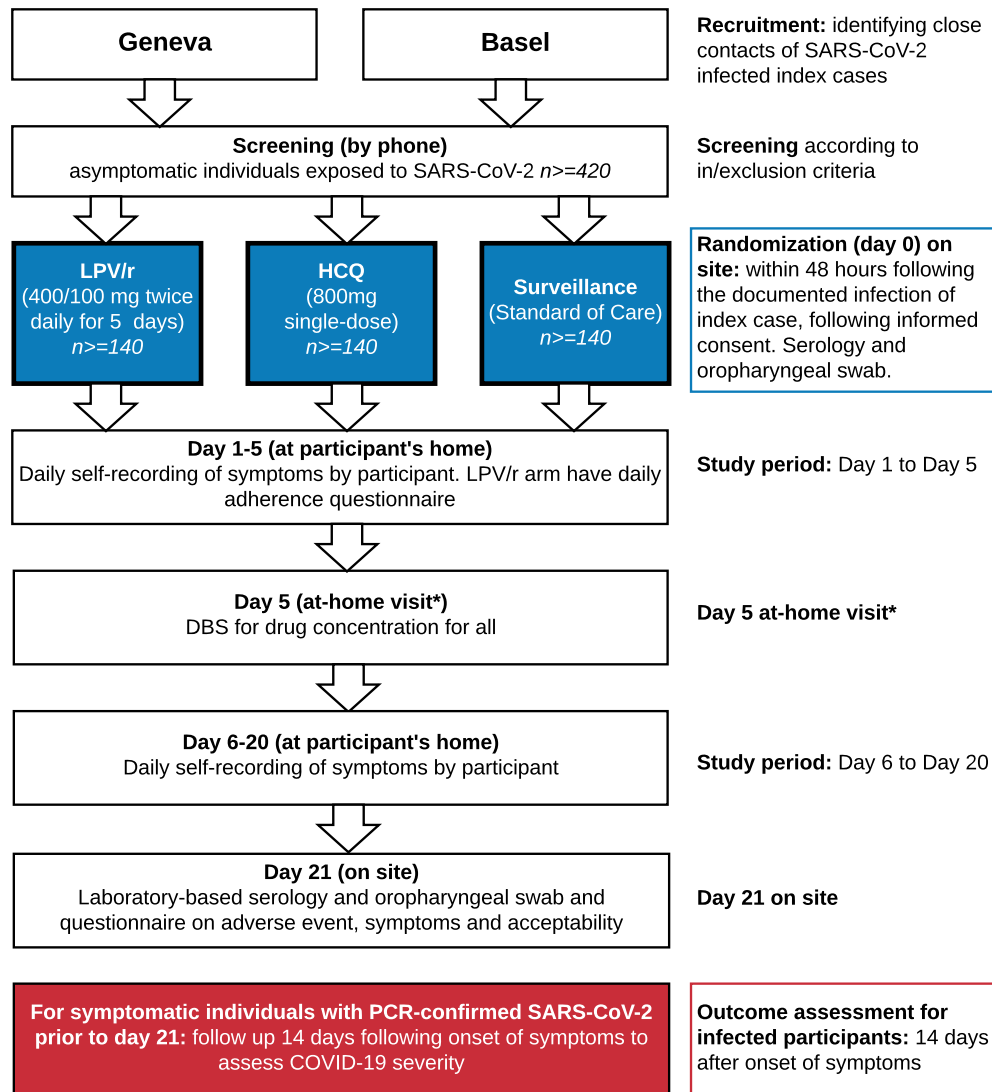

\*Day 5 visit: participants will be given the option of self-testing or of a home-visit to take the DBS samples.

Abbreviations: COVID-19 -coronavirus disease 19; HCQ – hydroxychloroquine; LPV/r – lopinavir/ritonavir; PCR – polymerase chain reaction; SARS-CoV-2 - severe acute respiratory syndrome coronavirus 2

# Reporting checklist for protocol of a clinical trial.

Based on the SPIRIT guidelines.

## Instructions to authors

Complete this checklist by entering the page numbers from your manuscript where readers will find each of the items listed below.

Your article may not currently address all the items on the checklist. Please modify your text to include the missing information. If you are certain that an item does not apply, please write "n/a" and provide a short explanation.

Upload your completed checklist as an extra file when you submit to a journal.

In your methods section, say that you used the SPIRIT reporting guidelines, and cite them as:

Chan A-W, Tetzlaff JM, Altman DG, Laupacis A, Gøtzsche PC, Krleža-Jerić K, Hróbjartsson A, Mann H, Dickersin K, Berlin J, Doré C, Parulekar W, Summerskill W, Groves T, Schulz K, Sox H, Rockhold FW, Rennie D, Moher D. SPIRIT 2013 Statement: Defining standard protocol items for clinical trials. *Ann Intern Med.* 2013;158(3):200-207

|                                             |                     | Reporting Item                                                                                               | Page Number |
|---------------------------------------------|---------------------|--------------------------------------------------------------------------------------------------------------|-------------|
| <b>Administrative information</b>           |                     |                                                                                                              |             |
| Title                                       | <a href="#">#1</a>  | Descriptive title identifying the study design, population, interventions, and, if applicable, trial acronym | 1           |
| Trial registration                          | <a href="#">#2a</a> | Trial identifier and registry name. If not yet registered, name of intended registry                         | 2, 4        |
| Trial registration: data set                | <a href="#">#2b</a> | All items from the World Health Organization Trial Registration Data Set                                     | 15          |
| Protocol version                            | <a href="#">#3</a>  | Date and version identifier                                                                                  | 15          |
| Funding                                     | <a href="#">#4</a>  | Sources and types of financial, material, and other support                                                  | 16          |
| Roles and responsibilities: contributorship | <a href="#">#5a</a> | Names, affiliations, and roles of protocol contributors                                                      | 1,16        |

|    |                           |                     |                                                                    |    |
|----|---------------------------|---------------------|--------------------------------------------------------------------|----|
| 1  | Roles and                 | <a href="#">#5b</a> | Name and contact information for the trial sponsor                 | 16 |
| 2  | responsibilities:         |                     |                                                                    |    |
| 3  | sponsor contact           |                     |                                                                    |    |
| 4  | information               |                     |                                                                    |    |
| 5  |                           |                     |                                                                    |    |
| 6  |                           |                     |                                                                    |    |
| 7  |                           |                     |                                                                    |    |
| 8  | Roles and                 | <a href="#">#5c</a> | Role of study sponsor and funders, if any, in study design;        | 16 |
| 9  | responsibilities:         |                     | collection, management, analysis, and interpretation of data;      |    |
| 10 | sponsor and funder        |                     | writing of the report; and the decision to submit the report for   |    |
| 11 |                           |                     | publication, including whether they will have ultimate authority   |    |
| 12 |                           |                     | over any of these activities                                       |    |
| 13 |                           |                     |                                                                    |    |
| 14 |                           |                     |                                                                    |    |
| 15 |                           |                     |                                                                    |    |
| 16 | Roles and                 | <a href="#">#5d</a> | Composition, roles, and responsibilities of the coordinating       | NA |
| 17 | responsibilities:         |                     | centre, steering committee, endpoint adjudication committee,       |    |
| 18 | committees                |                     | data management team, and other individuals or groups              |    |
| 19 |                           |                     | overseeing the trial, if applicable (see Item 21a for data         |    |
| 20 |                           |                     | monitoring committee)                                              |    |
| 21 |                           |                     |                                                                    |    |
| 22 |                           |                     |                                                                    |    |
| 23 |                           |                     |                                                                    |    |
| 24 | <b>Introduction</b>       |                     |                                                                    |    |
| 25 |                           |                     |                                                                    |    |
| 26 |                           |                     |                                                                    |    |
| 27 | Background and            | <a href="#">#6a</a> | Description of research question and justification for undertaking | 6  |
| 28 | rationale                 |                     | the trial, including summary of relevant studies (published and    |    |
| 29 |                           |                     | unpublished) examining benefits and harms for each intervention    |    |
| 30 |                           |                     |                                                                    |    |
| 31 |                           |                     |                                                                    |    |
| 32 | Background and            | <a href="#">#6b</a> | Explanation for choice of comparators                              | 6  |
| 33 | rationale: choice of      |                     |                                                                    |    |
| 34 | comparators               |                     |                                                                    |    |
| 35 |                           |                     |                                                                    |    |
| 36 |                           |                     |                                                                    |    |
| 37 | Objectives                | <a href="#">#7</a>  | Specific objectives or hypotheses                                  | 6  |
| 38 |                           |                     |                                                                    |    |
| 39 |                           |                     |                                                                    |    |
| 40 | Trial design              | <a href="#">#8</a>  | Description of trial design including type of trial (eg, parallel  | 6  |
| 41 |                           |                     | group, crossover, factorial, single group), allocation ratio, and  |    |
| 42 |                           |                     | framework (eg, superiority, equivalence, non-inferiority,          |    |
| 43 |                           |                     | exploratory)                                                       |    |
| 44 |                           |                     |                                                                    |    |
| 45 |                           |                     |                                                                    |    |
| 46 | <b>Methods:</b>           |                     |                                                                    |    |
| 47 | <b>Participants,</b>      |                     |                                                                    |    |
| 48 | <b>interventions, and</b> |                     |                                                                    |    |
| 49 | <b>outcomes</b>           |                     |                                                                    |    |
| 50 |                           |                     |                                                                    |    |
| 51 |                           |                     |                                                                    |    |
| 52 |                           |                     |                                                                    |    |
| 53 | Study setting             | <a href="#">#9</a>  | Description of study settings (eg, community clinic, academic      | 7  |
| 54 |                           |                     | hospital) and list of countries where data will be collected.      |    |
| 55 |                           |                     | Reference to where list of study sites can be obtained             |    |
| 56 |                           |                     |                                                                    |    |
| 57 |                           |                     |                                                                    |    |
| 58 |                           |                     |                                                                    |    |
| 59 |                           |                     |                                                                    |    |
| 60 |                           |                     |                                                                    |    |



|    |                              |                      |                                                                                                                                                                                                                                                                                                                                                                                |       |
|----|------------------------------|----------------------|--------------------------------------------------------------------------------------------------------------------------------------------------------------------------------------------------------------------------------------------------------------------------------------------------------------------------------------------------------------------------------|-------|
| 1  | Eligibility criteria         | <a href="#">#10</a>  | Inclusion and exclusion criteria for participants. If applicable, eligibility criteria for study centres and individuals who will perform the interventions (eg, surgeons, psychotherapists)                                                                                                                                                                                   | 7-8   |
| 2  |                              |                      |                                                                                                                                                                                                                                                                                                                                                                                |       |
| 3  |                              |                      |                                                                                                                                                                                                                                                                                                                                                                                |       |
| 4  |                              |                      |                                                                                                                                                                                                                                                                                                                                                                                |       |
| 5  |                              |                      |                                                                                                                                                                                                                                                                                                                                                                                |       |
| 6  | Interventions:               | <a href="#">#11a</a> | Interventions for each group with sufficient detail to allow replication, including how and when they will be administered                                                                                                                                                                                                                                                     | 8     |
| 7  | description                  |                      |                                                                                                                                                                                                                                                                                                                                                                                |       |
| 8  |                              |                      |                                                                                                                                                                                                                                                                                                                                                                                |       |
| 9  |                              |                      |                                                                                                                                                                                                                                                                                                                                                                                |       |
| 10 | Interventions:               | <a href="#">#11b</a> | Criteria for discontinuing or modifying allocated interventions for a given trial participant (eg, drug dose change in response to harms, participant request, or improving / worsening disease)                                                                                                                                                                               | NA    |
| 11 | modifications                |                      |                                                                                                                                                                                                                                                                                                                                                                                |       |
| 12 |                              |                      |                                                                                                                                                                                                                                                                                                                                                                                |       |
| 13 |                              |                      |                                                                                                                                                                                                                                                                                                                                                                                |       |
| 14 |                              |                      |                                                                                                                                                                                                                                                                                                                                                                                |       |
| 15 | Interventions:               | <a href="#">#11c</a> | Strategies to improve adherence to intervention protocols, and any procedures for monitoring adherence (eg, drug tablet return; laboratory tests)                                                                                                                                                                                                                              | 10-11 |
| 16 | adherence                    |                      |                                                                                                                                                                                                                                                                                                                                                                                |       |
| 17 |                              |                      |                                                                                                                                                                                                                                                                                                                                                                                |       |
| 18 |                              |                      |                                                                                                                                                                                                                                                                                                                                                                                |       |
| 19 |                              |                      |                                                                                                                                                                                                                                                                                                                                                                                |       |
| 20 | Interventions:               | <a href="#">#11d</a> | Relevant concomitant care and interventions that are permitted or prohibited during the trial                                                                                                                                                                                                                                                                                  | 7-8   |
| 21 | concomitant care             |                      |                                                                                                                                                                                                                                                                                                                                                                                |       |
| 22 |                              |                      |                                                                                                                                                                                                                                                                                                                                                                                |       |
| 23 |                              |                      |                                                                                                                                                                                                                                                                                                                                                                                |       |
| 24 | Outcomes                     | <a href="#">#12</a>  | Primary, secondary, and other outcomes, including the specific measurement variable (eg, systolic blood pressure), analysis metric (eg, change from baseline, final value, time to event), method of aggregation (eg, median, proportion), and time point for each outcome. Explanation of the clinical relevance of chosen efficacy and harm outcomes is strongly recommended | 9     |
| 25 |                              |                      |                                                                                                                                                                                                                                                                                                                                                                                |       |
| 26 |                              |                      |                                                                                                                                                                                                                                                                                                                                                                                |       |
| 27 |                              |                      |                                                                                                                                                                                                                                                                                                                                                                                |       |
| 28 |                              |                      |                                                                                                                                                                                                                                                                                                                                                                                |       |
| 29 |                              |                      |                                                                                                                                                                                                                                                                                                                                                                                |       |
| 30 |                              |                      |                                                                                                                                                                                                                                                                                                                                                                                |       |
| 31 |                              |                      |                                                                                                                                                                                                                                                                                                                                                                                |       |
| 32 |                              |                      |                                                                                                                                                                                                                                                                                                                                                                                |       |
| 33 |                              |                      |                                                                                                                                                                                                                                                                                                                                                                                |       |
| 34 | Participant timeline         | <a href="#">#13</a>  | Time schedule of enrolment, interventions (including any run-ins and washouts), assessments, and visits for participants. A schematic diagram is highly recommended (see Figure)                                                                                                                                                                                               | 10-11 |
| 35 |                              |                      |                                                                                                                                                                                                                                                                                                                                                                                |       |
| 36 |                              |                      |                                                                                                                                                                                                                                                                                                                                                                                |       |
| 37 |                              |                      |                                                                                                                                                                                                                                                                                                                                                                                |       |
| 38 |                              |                      |                                                                                                                                                                                                                                                                                                                                                                                |       |
| 39 |                              |                      |                                                                                                                                                                                                                                                                                                                                                                                |       |
| 40 | Sample size                  | <a href="#">#14</a>  | Estimated number of participants needed to achieve study objectives and how it was determined, including clinical and statistical assumptions supporting any sample size calculations                                                                                                                                                                                          | 11    |
| 41 |                              |                      |                                                                                                                                                                                                                                                                                                                                                                                |       |
| 42 |                              |                      |                                                                                                                                                                                                                                                                                                                                                                                |       |
| 43 |                              |                      |                                                                                                                                                                                                                                                                                                                                                                                |       |
| 44 |                              |                      |                                                                                                                                                                                                                                                                                                                                                                                |       |
| 45 | Recruitment                  | <a href="#">#15</a>  | Strategies for achieving adequate participant enrolment to reach target sample size                                                                                                                                                                                                                                                                                            | 10-11 |
| 46 |                              |                      |                                                                                                                                                                                                                                                                                                                                                                                |       |
| 47 |                              |                      |                                                                                                                                                                                                                                                                                                                                                                                |       |
| 48 |                              |                      |                                                                                                                                                                                                                                                                                                                                                                                |       |
| 49 | <b>Methods: Assignment</b>   |                      |                                                                                                                                                                                                                                                                                                                                                                                |       |
| 50 | <b>of interventions (for</b> |                      |                                                                                                                                                                                                                                                                                                                                                                                |       |
| 51 | <b>controlled trials)</b>    |                      |                                                                                                                                                                                                                                                                                                                                                                                |       |
| 52 |                              |                      |                                                                                                                                                                                                                                                                                                                                                                                |       |
| 53 |                              |                      |                                                                                                                                                                                                                                                                                                                                                                                |       |
| 54 | Allocation: sequence         | <a href="#">#16a</a> | Method of generating the allocation sequence (eg, computer-generated random numbers), and list of any factors for stratification. To reduce predictability of a random sequence, details of any planned restriction (eg, blocking) should be                                                                                                                                   | 12    |
| 55 | generation                   |                      |                                                                                                                                                                                                                                                                                                                                                                                |       |
| 56 |                              |                      |                                                                                                                                                                                                                                                                                                                                                                                |       |
| 57 |                              |                      |                                                                                                                                                                                                                                                                                                                                                                                |       |
| 58 |                              |                      |                                                                                                                                                                                                                                                                                                                                                                                |       |
| 59 |                              |                      |                                                                                                                                                                                                                                                                                                                                                                                |       |
| 60 |                              |                      |                                                                                                                                                                                                                                                                                                                                                                                |       |

provided in a separate document that is unavailable to those who enrol participants or assign interventions

|    |                        |                      |                                                                     |
|----|------------------------|----------------------|---------------------------------------------------------------------|
| 1  |                        |                      |                                                                     |
| 2  |                        |                      |                                                                     |
| 3  |                        |                      |                                                                     |
| 4  | Allocation             | <a href="#">#16b</a> | Mechanism of implementing the allocation sequence (eg, central      |
| 5  | concealment            |                      | telephone; sequentially numbered, opaque, sealed envelopes),        |
| 6  |                        |                      | describing any steps to conceal the sequence until interventions    |
| 7  | mechanism              |                      | are assigned                                                        |
| 8  |                        |                      |                                                                     |
| 9  |                        |                      |                                                                     |
| 10 |                        |                      |                                                                     |
| 11 | Allocation:            | <a href="#">#16c</a> | Who will generate the allocation sequence, who will enrol           |
| 12 | implementation         |                      | participants, and who will assign participants to interventions     |
| 13 |                        |                      |                                                                     |
| 14 |                        |                      |                                                                     |
| 15 | Blinding (masking)     | <a href="#">#17a</a> | Who will be blinded after assignment to interventions (eg, trial    |
| 16 |                        |                      | participants, care providers, outcome assessors, data analysts),    |
| 17 |                        |                      | and how                                                             |
| 18 |                        |                      |                                                                     |
| 19 |                        |                      |                                                                     |
| 20 | Blinding (masking):    | <a href="#">#17b</a> | If blinded, circumstances under which unblinding is permissible,    |
| 21 | emergency unblinding   |                      | and procedure for revealing a participant's allocated intervention  |
| 22 |                        |                      | during the trial                                                    |
| 23 |                        |                      |                                                                     |
| 24 |                        |                      |                                                                     |
| 25 | <b>Methods: Data</b>   |                      |                                                                     |
| 26 | <b>collection,</b>     |                      |                                                                     |
| 27 | <b>management, and</b> |                      |                                                                     |
| 28 | <b>analysis</b>        |                      |                                                                     |
| 29 |                        |                      |                                                                     |
| 30 |                        |                      |                                                                     |
| 31 |                        |                      |                                                                     |
| 32 | Data collection plan   | <a href="#">#18a</a> | Plans for assessment and collection of outcome, baseline, and       |
| 33 |                        |                      | other trial data, including any related processes to promote data   |
| 34 |                        |                      | quality (eg, duplicate measurements, training of assessors) and a   |
| 35 |                        |                      | description of study instruments (eg, questionnaires, laboratory    |
| 36 |                        |                      | tests) along with their reliability and validity, if known.         |
| 37 |                        |                      | Reference to where data collection forms can be found, if not in    |
| 38 |                        |                      | the protocol                                                        |
| 39 |                        |                      |                                                                     |
| 40 |                        |                      |                                                                     |
| 41 |                        |                      |                                                                     |
| 42 |                        |                      |                                                                     |
| 43 | Data collection plan:  | <a href="#">#18b</a> | Plans to promote participant retention and complete follow-up,      |
| 44 | retention              |                      | including list of any outcome data to be collected for participants |
| 45 |                        |                      | who discontinue or deviate from intervention protocols              |
| 46 |                        |                      |                                                                     |
| 47 |                        |                      |                                                                     |
| 48 |                        |                      |                                                                     |
| 49 | Data management        | <a href="#">#19</a>  | Plans for data entry, coding, security, and storage, including any  |
| 50 |                        |                      | related processes to promote data quality (eg, double data entry;   |
| 51 |                        |                      | range checks for data values). Reference to where details of data   |
| 52 |                        |                      | management procedures can be found, if not in the protocol          |
| 53 |                        |                      |                                                                     |
| 54 |                        |                      |                                                                     |
| 55 | Statistics: outcomes   | <a href="#">#20a</a> | Statistical methods for analysing primary and secondary             |
| 56 |                        |                      | outcomes. Reference to where other details of the statistical       |
| 57 |                        |                      | analysis plan can be found, if not in the protocol                  |
| 58 |                        |                      |                                                                     |
| 59 |                        |                      |                                                                     |
| 60 |                        |                      |                                                                     |

|    |                            |                      |                                                                    |       |
|----|----------------------------|----------------------|--------------------------------------------------------------------|-------|
| 1  | Statistics: additional     | <a href="#">#20b</a> | Methods for any additional analyses (eg, subgroup and adjusted     | 13-14 |
| 2  | analyses                   |                      | analyses)                                                          |       |
| 3  |                            |                      |                                                                    |       |
| 4  | Statistics: analysis       | <a href="#">#20c</a> | Definition of analysis population relating to protocol non-        | 13-14 |
| 5  | population and missing     |                      | adherence (eg, as randomised analysis), and any statistical        |       |
| 6  | data                       |                      | methods to handle missing data (eg, multiple imputation)           |       |
| 7  |                            |                      |                                                                    |       |
| 8  |                            |                      |                                                                    |       |
| 9  |                            |                      |                                                                    |       |
| 10 | <b>Methods: Monitoring</b> |                      |                                                                    |       |
| 11 |                            |                      |                                                                    |       |
| 12 | Data monitoring:           | <a href="#">#21a</a> | Composition of data monitoring committee (DMC); summary of         | NA    |
| 13 | formal committee           |                      | its role and reporting structure; statement of whether it is       |       |
| 14 |                            |                      | independent from the sponsor and competing interests; and          |       |
| 15 |                            |                      | reference to where further details about its charter can be found, |       |
| 16 |                            |                      | if not in the protocol. Alternatively, an explanation of why a     |       |
| 17 |                            |                      | DMC is not needed                                                  |       |
| 18 |                            |                      |                                                                    |       |
| 19 |                            |                      |                                                                    |       |
| 20 |                            |                      |                                                                    |       |
| 21 |                            |                      |                                                                    |       |
| 22 | Data monitoring:           | <a href="#">#21b</a> | Description of any interim analyses and stopping guidelines,       | NA    |
| 23 | interim analysis           |                      | including who will have access to these interim results and make   |       |
| 24 |                            |                      | the final decision to terminate the trial                          |       |
| 25 |                            |                      |                                                                    |       |
| 26 |                            |                      |                                                                    |       |
| 27 | Harms                      | <a href="#">#22</a>  | Plans for collecting, assessing, reporting, and managing solicited | 14    |
| 28 |                            |                      | and spontaneously reported adverse events and other unintended     |       |
| 29 |                            |                      | effects of trial interventions or trial conduct                    |       |
| 30 |                            |                      |                                                                    |       |
| 31 |                            |                      |                                                                    |       |
| 32 |                            |                      |                                                                    |       |
| 33 | Auditing                   | <a href="#">#23</a>  | Frequency and procedures for auditing trial conduct, if any, and   | NA    |
| 34 |                            |                      | whether the process will be independent from investigators and     |       |
| 35 |                            |                      | the sponsor                                                        |       |
| 36 |                            |                      |                                                                    |       |
| 37 |                            |                      |                                                                    |       |
| 38 | <b>Ethics and</b>          |                      |                                                                    |       |
| 39 | <b>dissemination</b>       |                      |                                                                    |       |
| 40 |                            |                      |                                                                    |       |
| 41 |                            |                      |                                                                    |       |
| 42 | Research ethics            | <a href="#">#24</a>  | Plans for seeking research ethics committee / institutional review | 15    |
| 43 | approval                   |                      | board (REC / IRB) approval                                         |       |
| 44 |                            |                      |                                                                    |       |
| 45 |                            |                      |                                                                    |       |
| 46 | Protocol amendments        | <a href="#">#25</a>  | Plans for communicating important protocol modifications (eg,      | NA    |
| 47 |                            |                      | changes to eligibility criteria, outcomes, analyses) to relevant   |       |
| 48 |                            |                      | parties (eg, investigators, REC / IRBs, trial participants, trial  |       |
| 49 |                            |                      | registries, journals, regulators)                                  |       |
| 50 |                            |                      |                                                                    |       |
| 51 |                            |                      |                                                                    |       |
| 52 |                            |                      |                                                                    |       |
| 53 | Consent or assent          | <a href="#">#26a</a> | Who will obtain informed consent or assent from potential trial    | 15    |
| 54 |                            |                      | participants or authorised surrogates, and how (see Item 32)       |       |
| 55 |                            |                      |                                                                    |       |
| 56 |                            |                      |                                                                    |       |
| 57 |                            |                      |                                                                    |       |
| 58 |                            |                      |                                                                    |       |
| 59 |                            |                      |                                                                    |       |
| 60 |                            |                      |                                                                    |       |

|    |                          |                      |                                                                      |    |
|----|--------------------------|----------------------|----------------------------------------------------------------------|----|
| 1  | Consent or assent:       | <a href="#">#26b</a> | Additional consent provisions for collection and use of              | NA |
| 2  | ancillary studies        |                      | participant data and biological specimens in ancillary studies, if   |    |
| 3  |                          |                      | applicable                                                           |    |
| 4  |                          |                      |                                                                      |    |
| 5  |                          |                      |                                                                      |    |
| 6  | Confidentiality          | <a href="#">#27</a>  | How personal information about potential and enrolled                | 14 |
| 7  |                          |                      | participants will be collected, shared, and maintained in order to   |    |
| 8  |                          |                      | protect confidentiality before, during, and after the trial          |    |
| 9  |                          |                      |                                                                      |    |
| 10 |                          |                      |                                                                      |    |
| 11 | Declaration of interests | <a href="#">#28</a>  | Financial and other competing interests for principal investigators  | 16 |
| 12 |                          |                      | for the overall trial and each study site                            |    |
| 13 |                          |                      |                                                                      |    |
| 14 |                          |                      |                                                                      |    |
| 15 | Data access              | <a href="#">#29</a>  | Statement of who will have access to the final trial dataset, and    | 14 |
| 16 |                          |                      | disclosure of contractual agreements that limit such access for      |    |
| 17 |                          |                      | investigators                                                        |    |
| 18 |                          |                      |                                                                      |    |
| 19 |                          |                      |                                                                      |    |
| 20 | Ancillary and post trial | <a href="#">#30</a>  | Provisions, if any, for ancillary and post-trial care, and for       | NA |
| 21 | care                     |                      | compensation to those who suffer harm from trial participation       |    |
| 22 |                          |                      |                                                                      |    |
| 23 |                          |                      |                                                                      |    |
| 24 | Dissemination policy:    | <a href="#">#31a</a> | Plans for investigators and sponsor to communicate trial results     | 16 |
| 25 | trial results            |                      | to participants, healthcare professionals, the public, and other     |    |
| 26 |                          |                      | relevant groups (eg, via publication, reporting in results           |    |
| 27 |                          |                      | databases, or other data sharing arrangements), including any        |    |
| 28 |                          |                      | publication restrictions                                             |    |
| 29 |                          |                      |                                                                      |    |
| 30 |                          |                      |                                                                      |    |
| 31 |                          |                      |                                                                      |    |
| 32 |                          |                      |                                                                      |    |
| 33 | Dissemination policy:    | <a href="#">#31b</a> | Authorship eligibility guidelines and any intended use of            | NA |
| 34 | authorship               |                      | professional writers                                                 |    |
| 35 |                          |                      |                                                                      |    |
| 36 |                          |                      |                                                                      |    |
| 37 | Dissemination policy:    | <a href="#">#31c</a> | Plans, if any, for granting public access to the full protocol,      | NA |
| 38 | reproducible research    |                      | participant-level dataset, and statistical code                      |    |
| 39 |                          |                      |                                                                      |    |
| 40 |                          |                      |                                                                      |    |
| 41 | <b>Appendices</b>        |                      |                                                                      |    |
| 42 |                          |                      |                                                                      |    |
| 43 | Informed consent         | <a href="#">#32</a>  | Model consent form and other related documentation given to          | NA |
| 44 | materials                |                      | participants and authorised surrogates                               |    |
| 45 |                          |                      |                                                                      |    |
| 46 |                          |                      |                                                                      |    |
| 47 | Biological specimens     | <a href="#">#33</a>  | Plans for collection, laboratory evaluation, and storage of          | NA |
| 48 |                          |                      | biological specimens for genetic or molecular analysis in the        |    |
| 49 |                          |                      | current trial and for future use in ancillary studies, if applicable |    |
| 50 |                          |                      |                                                                      |    |
| 51 |                          |                      |                                                                      |    |

The SPIRIT checklist is distributed under the terms of the Creative Commons Attribution License CC-BY-ND 3.0. This checklist was completed on 05. May 2020 using <https://www.goodreports.org/>, a tool made by the [EQUATOR Network](#) in collaboration with [Penelope.ai](#)

## Supplementary material

## Supplement 2. The World Health Organization Trial Registration Data Set for the COPEP trial

**1. Primary Registry and Trial Identifying Number**

Swiss National Clinical Trial Portal (SNCTP 000003732)

**2. Date of Registration in Primary Registry**

17.04.2020

**3. Secondary Identifying Numbers**

Clinicaltrials.gov (NCT04364022);

**4. Source of Monetary or Material Support**

Fondation privée des HUG

**5. Primary Sponsor**

Fondation privée des HUG

**6. Secondary Sponsor(s)**

SNF grant submitted

**7. Contact for Public Queries**

Professeur Alexandra Calmy

Hôpitaux Universitaires de Genève (HUG)

Rue Gabrielle-Perret-Gentil 4, 1205 Genève, Switzerland

Email : [alexandra.calmy@hcuge.ch](mailto:alexandra.calmy@hcuge.ch)

**8. Contact for Scientific Queries**

Dr Mikaela Smit

Hôpitaux Universitaires de Genève (HUG)

Rue Gabrielle-Perret-Gentil 4, 1205 Genève, Switzerland

Email : [mikaela.smit@hcuge.ch](mailto:mikaela.smit@hcuge.ch)

**9. Public Title**

Médecin adjointe agréée

Director of the HIV Unite

**10. Scientific Title**

Chef de Clinique Scientifique

Epidemiologist

**11. Countries of Recruitment**

Switzerland

**12. Health Conditions(s) or Problem(s) Studied**

COVID-19

**13. Intervention(s)**

## Supplementary material

*BMJ Open*

Participants will be randomized in household clusters, 1:1:1, to receive either a single dose of 800 mg of HCQ (4 x 200mg pills); LPV/r, 400mg/100mg (2x 200mg/50mg pills) twice daily for 5 days; or surveillance. The dose of HCQ and the first dose of LPV/r will be taken during the baseline visit, as directly observed therapy.

**14. Key Inclusion and Exclusion Criteria**

## Inclusion Criteria

1. Documented close contact with a PCR-confirmed SARS-CoV-2 positive individual within the last 48 hours;
2.  $\geq 18$  years of age;
3. Informed consent documented by signature;

## Exclusion Criteria

1. Fever (temperature  $>38.0^{\circ}$ ) and/or respiratory symptoms (cough, dyspnoea) and/or new anosmia/ageusia;
2. Individuals with previous confirmed SARS-CoV-2 infection;
3. Known impairment of liver function;
4. Haemolytic anaemia, porphyria, haemophilia and G6PD deficit; known retinopathy, epilepsy or visual field impairment;
5. Individuals with known severe renal impairment (creatinine clearance  $<30\text{mL/min}$ ) or undergoing dialysis;
6. Known hypersensitivity to any of the study medications;
7. Known *long* QT syndrome (LQTS)
8. Use of QT interval prolonging medications (<https://crediblemeds.org>), anti-arrhythmic drugs, or any other medications that are contraindicated with LPV/r and HCQ using the website [www.covid19-druginteractions.org](http://www.covid19-druginteractions.org)
9. Individuals on either HCQ or a boosted protease inhibitor as part of an antiretroviral therapy
10. Inability to be followed-up for the trial period

**15. Study type:**

Study type: interventional

Method of allocation: randomized

Masking: open

**16. Date of First Enrollment**

23/04/20

**17. Sample Size**

420

**18. Recruitment Status**

Recruiting

**19. Primary outcomes:**

Outcome: incidence of COVID-19

## Supplementary material

BMJ Open

Measurement:  $\geq 1$  symptom compatible with COVID-19 and either  
i) a positive PCR for SARS-CoV-2 in oropharyngeal swab and/or  
ii) a seroconversion of IgG only or IgG and IgA for SARS-CoV-2 at day 21 in individuals with negative serology at baseline. In case of seroconversion of IgA only, seroconversion of IgG using more sensitive spike-based recombination immunofluorescence assay (S-rIFA) will be assessed.

Timepoint: 21 days

**20. Key Secondary Outcomes**

Outcome: incidence of COVID-19

Measurement: modified ITT (negative SARS-CoV-2 PCR and serology at baseline)

Timepoint: 21 days

Outcome: incidence of SARS-CoV-2

Measurement: i) a positive PCR for SARS-CoV-2 (oropharyngeal swab) amongst those with a negative PCR at baseline and/or

ii) a seroconversion of IgG only or IgG and IgA for SARS-CoV-2 at day 21 in individuals with negative serology at baseline. In case of seroconversion of IgA only, seroconversion of IgG using more sensitive S-rIFA will be used.

Timepoint: 21 days

Outcome: severity of COVID-19

Measurement: 7-point ordinal scale

Timepoint: 14 days post onset of disease, end of hospitalization where applicable

**21. Ethics review**

The study has been approved by the following boards: Commission cantonale d'éthique de la recherche, Geneva, Switzerland (2020-00864), Ethikkommission Nordwest- und Zentralschweiz, Swissmedic (Swiss Agency for Therapeutic Products).

All participants will be asked for written informed consent. This trial will be conducted in accordance to Good Clinical Practice and the Helsinki Declaration.

**22. Completion data**

N/A

**23. Summary Results:**

N/A

**24. IPD sharing statement:**

Plan to share IPD: the IPD for this trial will not be made available

Plan description: study protocol



# BMJ Open

## Efficacy of pragmatic same-day ring prophylaxis for adult individuals exposed to SARS-CoV-2 in Switzerland (COPEP): protocol of an open-label cluster randomized trial

|                               |                                                                                                                                                                                                                                                                                                                                                                                                                                                                                                                                                                                                                                                                                                                                                                                                                                                                                                                                                                                                                                                                                                                                                                                                                                                                                                                                                                                                                                                                                                                                                                                                                                                                                                                                                                                                                                                                                                                                                                                                                                                                                                                                                      |
|-------------------------------|------------------------------------------------------------------------------------------------------------------------------------------------------------------------------------------------------------------------------------------------------------------------------------------------------------------------------------------------------------------------------------------------------------------------------------------------------------------------------------------------------------------------------------------------------------------------------------------------------------------------------------------------------------------------------------------------------------------------------------------------------------------------------------------------------------------------------------------------------------------------------------------------------------------------------------------------------------------------------------------------------------------------------------------------------------------------------------------------------------------------------------------------------------------------------------------------------------------------------------------------------------------------------------------------------------------------------------------------------------------------------------------------------------------------------------------------------------------------------------------------------------------------------------------------------------------------------------------------------------------------------------------------------------------------------------------------------------------------------------------------------------------------------------------------------------------------------------------------------------------------------------------------------------------------------------------------------------------------------------------------------------------------------------------------------------------------------------------------------------------------------------------------------|
| Journal:                      | <i>BMJ Open</i>                                                                                                                                                                                                                                                                                                                                                                                                                                                                                                                                                                                                                                                                                                                                                                                                                                                                                                                                                                                                                                                                                                                                                                                                                                                                                                                                                                                                                                                                                                                                                                                                                                                                                                                                                                                                                                                                                                                                                                                                                                                                                                                                      |
| Manuscript ID                 | bmjopen-2020-040110.R1                                                                                                                                                                                                                                                                                                                                                                                                                                                                                                                                                                                                                                                                                                                                                                                                                                                                                                                                                                                                                                                                                                                                                                                                                                                                                                                                                                                                                                                                                                                                                                                                                                                                                                                                                                                                                                                                                                                                                                                                                                                                                                                               |
| Article Type:                 | Protocol                                                                                                                                                                                                                                                                                                                                                                                                                                                                                                                                                                                                                                                                                                                                                                                                                                                                                                                                                                                                                                                                                                                                                                                                                                                                                                                                                                                                                                                                                                                                                                                                                                                                                                                                                                                                                                                                                                                                                                                                                                                                                                                                             |
| Date Submitted by the Author: | 07-Oct-2020                                                                                                                                                                                                                                                                                                                                                                                                                                                                                                                                                                                                                                                                                                                                                                                                                                                                                                                                                                                                                                                                                                                                                                                                                                                                                                                                                                                                                                                                                                                                                                                                                                                                                                                                                                                                                                                                                                                                                                                                                                                                                                                                          |
| Complete List of Authors:     | <p>Smit, Mikaela; Geneva University Hospitals, HIV Unit; University of Geneva, Faculty of Medicine</p> <p>Marinosci, Annalisa; Hopitaux Universitaires de Geneve, HIV Unit</p> <p>Nicoletti, Giovanni; Swiss Tropical and Public Health Institute, Department of Medicine</p> <p>Perneger, Thomas; Hopitaux Universitaires de Geneve, Division of clinical epidemiology; University of Geneva, Faculty of Medicine</p> <p>Ragozzino, Silvio; University of Basel, Department of Infectious Diseases and Hospital Epidemiology</p> <p>Andrey, Diego; Hopitaux Universitaires de Geneve, HIV Unit; University of Geneva, Faculty of Medicine</p> <p>Stoeckle, Marcel; University of Basel, Department of Infectious Diseases and Hospital Epidemiology</p> <p>Jacquierioz, Frederique; Hopitaux Universitaires de Geneve, Department of Primary Care</p> <p>Lebowitz, Dan; Hopitaux Universitaires de Geneve, Infection Control Programme; Republique et Canton de Geneve, Direction Geneale de la Sante</p> <p>Agoritsas, Thomas; Hopitaux Universitaires de Geneve, Faculty of Medicine; University of Geneva, Departement of Medicine</p> <p>Meyer, Benjamin; University of Geneva, Department of Pathology and Immunology,</p> <p>Spechbach, Herve; Hopitaux Universitaires de Geneve, Department of Primary Care</p> <p>Salamun, Julien; Hopitaux Universitaires de Geneve, Department of Primary Care</p> <p>Back, Moritz; Canton of Basel City, Gesundheitsdepartement</p> <p>Schaubhut, Carla; Canton of Basel City, Gesundheitsdepartement</p> <p>Fuchs, Simon; Canton of Basel City, Gesundheitsdepartement</p> <p>Decosterd, Laurent; University of Lausanne, Laboratory of Clinical Pharmacology</p> <p>Battegay, Manuel; University of Basel, Department of Infectious Diseases and Hospital Epidemiology</p> <p>Guessous, Idris; Hopitaux Universitaires de Geneve, Department of Primary Care</p> <p>Chappuis, François; Hopitaux Universitaires de Geneve, Department of Primary Care</p> <p>Kaiser, Laurent; Hopitaux Universitaires de Geneve, Division of Infectious Diseases; Hopitaux Universitaires de Geneve, Geneva Centre</p> |



|                                                        |                                                                                                                                                                                                                                                                                                                                      |
|--------------------------------------------------------|--------------------------------------------------------------------------------------------------------------------------------------------------------------------------------------------------------------------------------------------------------------------------------------------------------------------------------------|
|                                                        | for Emerging Viral Diseases Geneva<br>Labhardt, Niklaus; Swiss Tropical and Public Health Institute,<br>Department of Medicine, ; University of Basel, Department of Infectious<br>Diseases and Hospital Epidemiology<br>Calmy, Alexandra; Hopitaux Universitaires de Geneve, HIV Unit;<br>University of Geneva, Faculty of Medicine |
| <b>&lt;b&gt;Primary Subject<br/>Heading&lt;/b&gt;:</b> | Infectious diseases                                                                                                                                                                                                                                                                                                                  |
| Secondary Subject Heading:                             | Infectious diseases                                                                                                                                                                                                                                                                                                                  |
| Keywords:                                              | INFECTIOUS DISEASES, Epidemiology < INFECTIOUS DISEASES,<br>PREVENTIVE MEDICINE, Clinical trials < THERAPEUTICS, COVID-19                                                                                                                                                                                                            |
|                                                        |                                                                                                                                                                                                                                                                                                                                      |

SCHOLARONE™  
Manuscripts

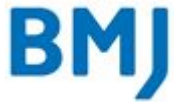

I, the Submitting Author has the right to grant and does grant on behalf of all authors of the Work (as defined in the below author licence), an exclusive licence and/or a non-exclusive licence for contributions from authors who are: i) UK Crown employees; ii) where BMJ has agreed a CC-BY licence shall apply, and/or iii) in accordance with the terms applicable for US Federal Government officers or employees acting as part of their official duties; on a worldwide, perpetual, irrevocable, royalty-free basis to BMJ Publishing Group Ltd ("BMJ") its licensees and where the relevant Journal is co-owned by BMJ to the co-owners of the Journal, to publish the Work in this journal and any other BMJ products and to exploit all rights, as set out in our [licence](#).

The Submitting Author accepts and understands that any supply made under these terms is made by BMJ to the Submitting Author unless you are acting as an employee on behalf of your employer or a postgraduate student of an affiliated institution which is paying any applicable article publishing charge ("APC") for Open Access articles. Where the Submitting Author wishes to make the Work available on an Open Access basis (and intends to pay the relevant APC), the terms of reuse of such Open Access shall be governed by a Creative Commons licence – details of these licences and which [Creative Commons](#) licence will apply to this Work are set out in our licence referred to above.

Other than as permitted in any relevant BMJ Author's Self Archiving Policies, I confirm this Work has not been accepted for publication elsewhere, is not being considered for publication elsewhere and does not duplicate material already published. I confirm all authors consent to publication of this Work and authorise the granting of this licence.

1  
2  
3 1 **Efficacy of pragmatic same-day ring prophylaxis for adult individuals exposed to**  
4  
5 2 **SARS-CoV-2 in Switzerland (COPEP): protocol of an open-label cluster randomized**  
6  
7 3 **trial**  
8  
9 4

10  
11 5 Mikaela SMIT<sup>1,2,3</sup>, Annalisa MARINOSCI<sup>1</sup>, Giovanni Jacopo NICOLETTI<sup>4</sup>, Thomas  
12  
13 6 PERNEGER<sup>2,5</sup>, Silvio RAGOZZINO<sup>6</sup>, Diego O ANDREY<sup>1,2,7</sup>, Marcel P STOECKLE<sup>6</sup>,  
14  
15 7 Frédérique JACQUERIOZ<sup>8</sup>, Dan LEBOWITZ<sup>9,10</sup>, Thomas AGORITSAS<sup>2,11,12</sup>, Benjamin  
16  
17 8 MEYER<sup>13</sup>, Hervé SPECHBACH<sup>8</sup>, Julien SALAMUN<sup>8</sup>, Moritz BACK<sup>14</sup>, Carla SCHAUBHUT<sup>14</sup>,  
18  
19 9 Simon FUCHS<sup>14</sup>, Laurent DECOSTERD<sup>15</sup>, Manuel BATTEGAY<sup>6</sup>, Idris GUESSOUS<sup>8</sup>,  
20  
21 10 Francois CHAPPUIS<sup>8</sup>, Laurent KAISER<sup>16,17</sup>, Niklaus D LABHARDT<sup>3,6</sup>, Alexandra CALMY<sup>1,2</sup>  
22  
23  
24 11

25  
26 12 From: <sup>1</sup>HIV Unit, Geneva University Hospitals, Switzerland; <sup>2</sup>Faculty of Medicine, University  
27  
28 13 of Geneva, Switzerland; <sup>3</sup>Department of Infectious Disease Epidemiology, Imperial College,  
29  
30 14 Faculty of Medicine, London, UK; <sup>4</sup>Department of Medicine, Swiss Tropical and Public  
31  
32 15 Health Institute, Switzerland; <sup>5</sup>Division of Clinical Epidemiology, Geneva University  
33  
34 16 Hospitals, Switzerland; <sup>6</sup>Department of Infectious Diseases and Hospital Epidemiology,  
35  
36 17 University Hospital of Basel, Switzerland; <sup>7</sup>Division of Laboratory Medicine, Diagnostic  
37  
38 18 Department, Geneva University Hospitals, Switzerland; <sup>8</sup>Department of Primary Care,  
39  
40 19 Geneva University Hospitals, Switzerland; <sup>9</sup>Infection Control Programme, Geneva University  
41  
42 20 Hospitals, Switzerland; <sup>10</sup>Direction Générale de la Santé, Canton de Genève, Switzerland;  
43  
44 21 <sup>11</sup>Departement of Medicine, Geneva University Hospitals, Switzerland; <sup>12</sup>Departement of  
45  
46 22 Health Research Methods, Evidence, and Impact, Hamilton, Ontario, Canada; <sup>13</sup>Centre for  
47  
48 23 Vaccinology, Department of Pathology and Immunology, University of Geneva, Switzerland,  
49  
50 24 <sup>14</sup>Gesundheitsdepartement des Kantons Basel-Stadt; <sup>15</sup>Laboratory of Clinical Pharmacology,  
51  
52 25 Lausanne University Hospital, Switzerland; <sup>16</sup>Division of Infectious Diseases, Geneva  
53  
54 26 University Hospitals, Switzerland; <sup>17</sup>Geneva Centre for Emerging Viral Diseases Geneva  
55  
56 27 University Hospitals, Switzerland.  
57  
58  
59  
60 28

1  
2  
3 29 **Keywords:** COVID-19; SARS-CoV-2, prophylaxis; cluster randomized trial; lopinavir  
4  
5  
6

7  
8  
9 30

10  
11 31 **Running title:** COPEP (Coronavirus post-exposure prophylaxis) trial  
12  
13

14  
15 32

16 33 **Word count:** 2,621  
17

18 34 **Corresponding author:**

19 35 Dr Mikaela Smit, <sup>1</sup>HIV Unit, Geneva University Hospitals, Switzerland.  
20

21 36 Email: [Mikaela.smit@hcuge.ch](mailto:Mikaela.smit@hcuge.ch)  
22

23 37

24 38 **40 Word Summary:**

25 39 COPEP is a two-arm cluster randomized open-label clinical trial to test the efficacy of

26 40 lopinavir/ritonavir versus the standard of care as post-exposure ring prophylaxis for adults

27 41 exposed to SARS-CoV-2.  
28  
29  
30  
31  
32  
33  
34  
35  
36  
37  
38  
39  
40  
41  
42  
43  
44  
45  
46  
47  
48  
49  
50  
51  
52  
53  
54  
55  
56  
57  
58  
59  
60

**Abstract****Introduction**

Lopinavir/ritonavir (LPV/r) has been proposed as repurposed drugs for pre- and post-exposure prophylaxis as well as therapy of Coronavirus Disease (COVID-19). COPEP (Coronavirus post-exposure prophylaxis) trial aims at assessing their efficacy as post-exposure ring-prophylaxis among adults exposed to severe acute respiratory syndrome coronavirus 2 (SARS-CoV-2).

**Methods and Analysis**

COPEP is a two-arm open-label cluster-randomized trial conducted in three cantons of Switzerland. Asymptomatic contacts ( $\geq 16$  years) of individuals diagnosed with COVID-19 will be randomized (2:1) to either lopinavir/ritonavir (LPV/r) (400mg/100mg twice daily) for 5 days, or a standard of care arm (no treatment). Asymptomatic individuals may be either SARS-CoV-2 positive or negative. Contacts living in the single household will form a cluster and will be randomized into the same arm. All participants will be followed-up for 21 days and undergo daily monitoring for COVID-19 symptoms. The primary endpoint is 21-day incidence of laboratory-confirmed COVID-19 with  $\geq 1$  compatible symptom, analyzed in an intention-to-treat (ITT) analysis. The secondary endpoints include the 21-day incidence of COVID-19 as well as SARS-CoV-2 infection in a modified ITT analysis, excluding participants who had a positive SARS-CoV-2 RT-PCR (polymerase chain reaction) from oropharyngeal swab and/or a positive SARS-CoV-2 IgG serology at baseline. Assuming a 21-day incidence for COVID-19 of 20% among contacts without post-exposure chemoprophylaxis, to detect a relative risk reduction of 60% (i.e. translating in an absolute reduction from 20% to 8%), with a power of 80%, an alpha of 5%. Accounting for design effect of cluster design of circa 1.1, we plan to enroll 200 participants to the LPV/r arm and 100 to the standard of care arm, 300 participants in total.

**Ethics and Dissemination** Ethics approval has been granted by the Commission Cantonale d’Ethique de la Recherche, Ethikkommission Nordwest- und Zentralschweiz and Comitato Etico Cantonale (ref 2020-00864) and Swissmedic (2020DR3056). Results from this trial will

1  
2  
3 70 be disseminated via journal articles and presentations at national and international  
4  
5 71 conferences.  
6

7  
8 72

9 73 **Trial registration:** Clinicaltrials.gov (NCT04364022); Swiss National Clinical Trial Portal  
10  
11 74 (SNCTP 000003732)  
12

13 75 **Registered Report Identifier:** CCER 2020-0864  
14  
15

16 76  
17  
18  
19  
20  
21  
22  
23  
24  
25  
26  
27  
28  
29  
30  
31  
32  
33  
34  
35  
36  
37  
38  
39  
40  
41  
42  
43  
44  
45  
46  
47  
48  
49  
50  
51  
52  
53  
54  
55  
56  
57  
58  
59  
60

For peer review only

1  
2  
3 77 **Strengths and Limitations:**  
4

- 5 78 - Amongst the first clinical trials to study two prophylactic candidates for COVID-19 in  
6  
7 79 the general population as well as health care workers.  
8  
9 80 - The trial will test pragmatic ring prophylactic strategies that can be prescribed the  
10  
11 81 same day with minimal clinical and laboratory assessment  
12  
13  
14 82 - Recruitment may be slowed down by the evolution of the epidemic.  
15  
16 83 - This is an unblinded trial  
17  
18  
19 84

## 85 Introduction

86 Since the beginning of the Severe Acute Respiratory Syndrome coronavirus 2 (SARS-CoV-2)  
87 outbreak in December 2019, the medical and scientific community has scrambled to identify  
88 effective pharmacological candidates for its prevention and treatment. Coronavirus Disease-  
89 19 (COVID-19, which is the clinical manifestation of SARS-CoV-2 infection) has caused  
90 unprecedented pressure on modern health systems across the world. The sudden and  
91 uncontrolled influx of severe COVID-19 cases has caused critical shortage of hospital-based  
92 resources and forced many countries into lockdown in early 2020.

93 Containing the COVID-19 pandemic may necessitate a multi-pronged strategy,  
94 including immunization, treatment, and prophylaxis. The latter would facilitate the containment  
95 of future outbreaks of the disease in non-immunized populations. This current pandemic wave  
96 will likely be followed by subsequent outbreaks and authorities will need to consider less strict  
97 isolation measures when apprising multiple economic impacts (including on health-related  
98 outcome) over a prolonged period of time.

99 Several drugs have been identified as possible prophylactic candidates. These include  
100 the protease inhibitors lopinavir/ritonavir (LPV/r) used for the treatment of HIV.<sup>1,2</sup> Protease  
101 inhibitors work by preventing viral replication and LPV/r has been shown to bind to active site  
102 of the SARS-CoV protease *in vitro*, with studies confirming that the spatial structure of the  
103 binding site was conserved between SARS-CoV and SARS-CoV-2.<sup>3-5</sup> LPV/r is licensed in  
104 most countries, are part of the World Health Organization essential list, and are available  
105 globally and at low cost.<sup>6</sup>

106 However, to date there are no published randomized studies assessing the efficacy of  
107 LPV/r as prophylaxis for COVID-19. COPEP (coronavirus post-exposure prophylaxis) is a  
108 Swiss two-arm open-label cluster randomized trial that will assess the efficacy, safety and  
109 acceptability of same-day LPV/r-based prophylaxis, compared to standard of care alone (no  
110 treatment) for asymptomatic individuals exposed to SARS-CoV-2.

111  
112



## 113 **Methods**

114 COPEP is an open-label two-arm (2:1) cluster randomized superiority trial to assess efficacy,  
115 safety and acceptability of same-day same-day LPV/r-prophylaxis versus standard of care (no  
116 treatment) for asymptomatic adult individuals exposed to SARS-CoV-2. Asymptomatic  
117 individuals may be either SARS-CoV-2 positive or negative. The study will be performed at  
118 three sites in Switzerland, Geneva, Basel and Lugano, and seeks to recruit 300 participants  
119 over eight to nine months. The main objective of COPEP is to assess prevention of laboratory-  
120 confirmed COVID-19 with  $\geq 1$  compatible symptom, with secondary objectives including  
121 preventing of SARS-CoV-2 infection, and attenuation of COVID-19 severity.

## 123 **Participants**

124 This trial enrolls individuals ( $\geq 16$  years) who have come into close contact with a confirmed  
125 case of SARS-CoV-2 infection. Individuals are eligible to be enrolled if the contact occurred  
126 within the last 7 days but no more than 72 hours after the index case was diagnosed. A close  
127 contact is defined, as per the Swiss Federal Office of Public Health, as a person who spent  
128  $>15$  minutes in  $< 2$  meter distance or shared closed space with a confirmed case for a  
129 prolonged period (e.g. more than 2 hours) in the period extending from 48 hours before onset  
130 of symptoms (or before date of testing in absence of symptoms), or a person who had direct  
131 contact with the body fluids or laboratory specimens of a case without recommended personal  
132 protective equipment (PPE) or in case of failure of PPE.

133 Recruitment of participants to this study will be performed through two routes; i) the  
134 Public Health Authorities in Geneva, Basel and Lugano, who, as the standard of care, contact  
135 all individuals tested positive for SARS-CoV-2 to provide them with instructions on isolating  
136 procedures and self-monitoring, and ii) health care workers will be recruited via social media  
137 platforms and internal hospital-based platforms. All close contacts of confirmed SARS-CoV-2  
138 positive index case will be screened for eligibility (Table 1).

139

140

141 **Table 1.** Inclusion and exclusion criteria.

| Inclusion Criteria                                                                                                                                                                                                                                     | Exclusion criteria                                                                                                                                                                                                                                                                                                                                                                                                                                                                                                                                                                                                                                 |
|--------------------------------------------------------------------------------------------------------------------------------------------------------------------------------------------------------------------------------------------------------|----------------------------------------------------------------------------------------------------------------------------------------------------------------------------------------------------------------------------------------------------------------------------------------------------------------------------------------------------------------------------------------------------------------------------------------------------------------------------------------------------------------------------------------------------------------------------------------------------------------------------------------------------|
| 1. Documented close contact with a PCR-confirmed SARS-CoV-2 positive individual;<br>2. $\geq 16$ years of age;<br>3. Informed consent documented by signature (including parent's or legal guardian's signature if the participant is 16 and 18 y.o.); | 1. Fever (temperature $>38.0^{\circ}$ ) and/or respiratory symptoms (cough, dyspnoea) and/or new anosmia/ageusia;<br>2. Individuals with previous confirmed SARS-CoV-2 infection within the last six months;<br>3. Known impairment of liver function;<br>4. Known hypersensitivity to any of the study medications;<br>5. Use of any medications that are contraindicated with LPV/r using the website <a href="http://www.hiv-druginteractions.org/checker">www.hiv-druginteractions.org/checker</a><br>6. Individuals on boosted protease inhibitor as part of an antiretroviral therapy<br>7. Inability to be followed-up for the trial period |

142 *Abbreviations: LPV/r – lopinavir/ritonavir; SARS-CoV-2 - severe acute respiratory syndrome*  
 143 *coronavirus 2*

### 145 **Intervention**

146 Participants will be randomized in household clusters, 2:1, to receive either LPV/r,  
 147 400mg/100mg (2x 200mg/50mg pills) twice daily for 5 days; or standard of care (no treatment).  
 148 The first dose of LPV/r will be taken during the baseline visit, as directly observed therapy.

### 150 **Outcomes**

#### 151 *Primary Endpoint*

152 The primary endpoint is the 21-day incidence of laboratory-confirmed COVID-19 with  $\geq 1$   
 153 compatible symptom in individuals exposed to SARS-CoV-2 who are asymptomatic (either  
 154 SARS\_CoV-2 positive or negative) at baseline. The primary analysis includes all individuals  
 155 enrolled, irrespective of their baseline oropharyngeal swab results or the baseline SARS-CoV-  
 156 2 serology (intent-to-treat (ITT) analysis).

1  
2  
3 159 *Secondary endpoints*  
4

- 5 160 - 21-day incidence of COVID-19 in individuals exposed to SARS-CoV-2 who are  
6  
7 161 asymptomatic, and have negative SARS-CoV-2 PCR and serology at baseline (modified  
8  
9 162 ITT),  
10  
11 163 - 21-day incidence of SARS-CoV-2 infection in individuals exposed to SARS-CoV-2 who  
12  
13 164 are asymptomatic, and have negative SARS-CoV-2 PCR and serology at baseline  
14  
15 165 (modified ITT)  
16  
17 166 - Severity of clinical COVID-19 on a 7-point ordinal scale  
18  
19 167 - Incidence of serious adverse events.  
20  
21  
22  
23

24 168

25 169 Explorative endpoints include;

- 26  
27 170 i) acceptability of a prophylaxis for COVID-19,  
28  
29 171 ii) reported adherence to LPV/r for participants on the LPV/r arm and HCQ and LPV/r drug  
30  
31 172 levels on day 5 amongst all individuals.  
32

33 173

34 174

35  
36  
37 175 **Measurements**  
38

39 176 The following clinical definitions will be used. COVID-19 is defined as  $\geq 1$  symptom compatible  
40  
41 177 with COVID-19 (cough, dyspnea, anosmia, ageusia, elevated temperature ( $>38^\circ$ )) and either  
42

43 178 i) a positive PCR for SARS-CoV-2 in oropharyngeal swab and/or

44  
45 179 ii) a seroconversion of IgG only or IgG and IgA for SARS-CoV-2 at day 21 in individuals with  
46  
47 180 negative serology at baseline. In case of seroconversion of IgA only, seroconversion of IgG  
48  
49 181 using more sensitive spike-based recombination immunofluorescence assay (S-rIFA) will be  
50  
51 182 assessed.  
52  
53

54 183

55  
56 184 New SARS-CoV-2 infection is defined as  
57  
58  
59  
60

- 1  
2  
3 185 i) a positive PCR for SARS-CoV-2 (oropharyngeal swab) amongst those with a negative PCR  
4  
5 186 at baseline and/or  
6  
7 187 ii) a seroconversion of IgG only or IgG and IgA for SARS-CoV-2 at day 21 in individuals with  
8  
9 188 negative serology at baseline. In case of seroconversion of IgA only, seroconversion of IgG  
10  
11 189 using more sensitive S-rIFA will be used.  
12

13  
14 190

15  
16 191 Seroconversion for SARS-CoV-2 is defined as negative results for IgG in ELISA at baseline  
17  
18 192 and either

19  
20 193 i) positive result for IgG in ELISA and confirmation by S-rIFA at day 21 or

21  
22 194 ii) doubtful result for IgG in ELISA at day 21 and confirmation by S-rIFA. In case of negative  
23  
24 195 result for IgG in ELISA at day 21 seroconversion can alternatively be defined as follows:  
25  
26 196 Negative result of IgA in ELISA at baseline and i) positive or doubtful result for IgA in ELISA  
27  
28 197 at day 21 and ii) positive result for IgG in S-rIFA at day 21.  
29

30  
31 198

### 32 199 **Procedures**

33  
34 200 All participants will be followed-up for 21 days (Fig 1 and Table 2). Participants will undergo  
35  
36 201 an oropharyngeal swab for SARS-CoV-2 PCR and a SARS-CoV-2 serology at baseline and  
37  
38 202 on Day 21. In addition, participants will be asked to provide on day 5 a capillary puncture on  
39  
40 203 dried blood spot (DBS) to assess blood levels of LPV/r. Participants will be given the option of  
41  
42 204 “self-test”, or of a home-visit for this DBS procedure.  
43  
44 205

45  
46 206

47 206 During follow-up, individuals will be asked to complete a daily online COVID-19 symptoms  
48  
49 207 questionnaire. The online questionnaire generates alerts when individuals report a symptom  
50  
51 208 associated with COVID-19 and if participants do not complete the questionnaire for 2  
52  
53 209 consecutive days. The online questionnaire also serves as a reminder for those on the LPV/r  
54  
55 210 arm, to take their daily medication up to Day 5. Paper questionnaires will be made available  
56  
57 211 for those without access to internet. All questionnaires are available in several languages.  
58  
59 212

60

1  
2  
3 213 The team will contact the participant in case an alert is triggered and do a first clinical  
4  
5 214 assessment by phone. Participants who report COVID-related symptoms (e.g. dyspnoea,  
6  
7 215 cough, fever (>38.0C), anosmia) will be asked to come on site for an extra visit and undergo  
8  
9 216 clinical assessment and an oropharyngeal swab to confirm/exclude SARS-CoV-2 infection. If  
10  
11 217 found positive, participants will be provided with appropriate care, as per local protocol. A  
12  
13 218 follow-up visit 14 days after a positive diagnosis will be conducted, in order to establish the  
14  
15 219 level of clinical manifestation of disease.  
16

17  
18 220  
19  
20 221 On Day 21, participants will further complete a questionnaire on adverse events and  
21  
22 222 acceptability of the treatment. Participants on the LPV/r arm are asked to bring the vials which  
23  
24 223 contained the medication to the Day 21 visit, so that the study team can record the number of  
25  
26 224 returned pills, as per Good Clinical Practice standard.  
27

28 225

### 29 226 **Sample size**

30  
31  
32 227 The sample size for the primary endpoint assumes that without treatment 20% of close  
33  
34 228 contacts will develop COVID-19, based on the clinical observations made by the team. To  
35  
36 229 detect a relative risk reduction of 60% (i.e. translating in an absolute reduction from 20% to  
37  
38 230 8%), with a power of 80%, an alpha of 5% and accounting for design effect of cluster design  
39  
40 231 of circa 1.1 (based on  $= (n - 1)\rho + 1$ , where  $n=3$  denotes the average cluster size, and  
41  
42 232  $\rho=0.05$  is the assumed intraclass correlation coefficient). A sample size of 200 participants on  
43  
44 233 LPV/r and 100 on standard of care arm, or 300 in total will thus be needed.  
45

46 234

47  
48  
49 235 For the first of the secondary endpoint (occurrence of new SARS-CoV-2 infection) we assume  
50  
51 236 40% of close contact without prophylaxis will become infected and 16% with prophylaxis; but  
52  
53 237 we also expect a baseline prevalence of positive PCR of 30% (these participants will be  
54  
55 238 excluded from this analysis in a modified ITT). With an effective sample size of 140 individuals  
56  
57 239 on the LPV/r arm ( $200 \times 0.7$ ) and 70 on the standard of care arm ( $100 \times 0.7$ ) the power will be  
58  
59 240 95% for this endpoint.  
60

## 241 **Randomization and blinding**

242 Randomization will be done in variable-sized blocks (sizes 6 or 9) in random sequence,  
243 stratified by site (Geneva, Basel, and Lugano). Randomization will be done by cluster, that is  
244 where close contacts reside in the same household (for example the family or friends of the  
245 index case that live together). The randomization procedure will consist of sealed envelopes,  
246 one for each household cluster, prepared by individuals who are not associated with the  
247 recruitment for the trial. Treatment will be identical within households because of the risk of  
248 cross-contamination and to simplify treatment administration to individuals in the same  
249 household. This is an open-label trial.

250

## 251 **Statistical analysis**

252 For the analysis of the primary endpoint, 21-day incidence of COVID-19, we will perform an  
253 intention to treat analysis (ITT), including all individuals who were randomized (including those  
254 who will retrospectively be found to be PCR-confirmed SARS-CoV-2 positive at baseline as  
255 well as individuals retrospectively found SARS-CoV-2 seropositive by serology).

256

257 The intervention arm, LPV/r, will be compared to the surveillance arm, using separate indicator  
258 variables for the active treatment arms. Because the hypotheses about treatment efficacy are  
259 unrelated and independent, and because we will focus on estimation and confidence intervals  
260 rather than on statistical tests, no adjustment will be done for multiplicity. Since individual  
261 observations will be clustered within households (randomization units), themselves nested  
262 within index cases, we will use mixed complementary log-log regression models for the main  
263 analysis (complementary log-log regression is similar to logistic regression, but yields relative  
264 hazards, rather than odds ratios; relative hazards are more readily interpretable in the context  
265 of disease incidence). The outcome variable will be the occurrence of COVID-19 by day 21.  
266 A random intercept will be defined by each household, nested within the index case. The main  
267 fixed effect will be treatment. The main statistical model will be adjusted for potential  
268 confounding variables, guided by the most up to date evidence. We foresee that for the

1  
2  
3 269 incidence of COVID-19, adjustment variables are: age, presence of comorbidities (specifically  
4  
5 270 cardiac, liver or pulmonary disease), treatment of the index case, occupational versus non-  
6  
7 271 occupational exposure, and/or positive serology.  
8

9 272

10  
11 273 In a modified intent to treat analysis we will evaluate the secondary endpoints; i) 21-day  
12  
13 274 incidence of COVID-19 in individuals exposed to SARS-CoV-2 who are asymptomatic, PCR-  
14  
15 275 confirmed SARS-CoV-2 negative and have negative SARS-CoV-2 serology at baseline  
16  
17 276 (modified ITT), ii) 21-day incidence of SARS-CoV-2 infection in individuals exposed to SARS-  
18  
19 277 CoV-2 who are asymptomatic, PCR-confirmed SARS-CoV-2 negative and have negative  
20  
21 278 SARS-CoV-2 serology at baseline (modified ITT). The output will be an adjusted relative  
22  
23 279 hazard of the treatment effect versus surveillance, with a 95% confidence interval.  
24  
25

26 280

27  
28 281 For the secondary outcome “severity of disease”, rated on a 7-point scale, we will use a Mann-  
29  
30 282 Whitney test to compare this ordinal outcome variable between intervention arm and  
31  
32 283 surveillance. For the analysis of individual-reported adverse events, the population will include  
33  
34 284 all randomized participants, and the comparisons will be by cross-tabulations and chi-square  
35  
36 285 tests, since the probability of experiencing adverse events will likely not be affected by  
37  
38 286 clustering. For the analysis of acceptability/compliance, only the intervention arm will be  
39  
40 287 evaluated. We will use R software version 1.2.5019 and Stata software version 16 for the  
41  
42 288 analysis.  
43  
44

45 289

#### 46 47 290 **Data collection and management**

48  
49 291 Any data collected during the course of this study will be protected under secure password,  
50  
51 292 or kept under lock and key in the research office. No records bearing patient identification will  
52  
53 293 be provided to anyone outside of the institution except regulatory agencies. Patients will not  
54  
55 294 be identifiable as individuals in any publication or presentation of this study. Data will be  
56  
57 295 recorded in RedCap and analysed as described above. The trial will follow all standard  
58  
59  
60



296 procedures, including reporting of adverse events. The protocol was written in accordance  
297 with SPIRIT checklist (Appendix 1)

298

299

### 300 Patient and public involvement

301 No patient or patient advisor was involved with study design, recruitment or conduct.

302

303 **Table 2.** SPIRIT table.

|                                                                                                                                                                                                                                                                                          | Screening      | Baseline:<br>Day 0 | Day 1-21<br>(Daily self-<br>assessment)<br>Participant's<br>home | Day 5 <sup>9</sup> | Day 21<br>On-site |
|------------------------------------------------------------------------------------------------------------------------------------------------------------------------------------------------------------------------------------------------------------------------------------------|----------------|--------------------|------------------------------------------------------------------|--------------------|-------------------|
|                                                                                                                                                                                                                                                                                          | Phone          | On-site            |                                                                  |                    |                   |
| <b>Informed consent procedure</b>                                                                                                                                                                                                                                                        | X <sup>1</sup> | X <sup>3</sup>     |                                                                  |                    |                   |
| <b>Eligibility check; inclusion and exclusion criteria</b>                                                                                                                                                                                                                               | X <sup>2</sup> | X <sup>4</sup>     |                                                                  |                    |                   |
| <b>Oropharyngeal swab</b>                                                                                                                                                                                                                                                                |                | X                  | Prompted by COVID-19 compatible symptoms <sup>5</sup>            |                    | X                 |
| <b>Laboratory-based serology</b>                                                                                                                                                                                                                                                         |                | X                  |                                                                  |                    | X                 |
| <b>Randomization</b>                                                                                                                                                                                                                                                                     |                | X                  |                                                                  |                    |                   |
| <b>Administration of prophylaxis<sup>6</sup></b>                                                                                                                                                                                                                                         |                | X                  | X <sup>7</sup>                                                   |                    |                   |
| <b>Daily Self-assessment</b>                                                                                                                                                                                                                                                             |                |                    | X                                                                |                    |                   |
| <b>Questionnaire on adherence of intervention<sup>7,8</sup></b>                                                                                                                                                                                                                          |                |                    | X <sup>7,8</sup>                                                 |                    |                   |
| <b>Questionnaire on adverse events</b>                                                                                                                                                                                                                                                   |                |                    |                                                                  | X                  | X                 |
| <b>Dried blood spot collection for blood drug concentration</b>                                                                                                                                                                                                                          |                |                    |                                                                  | X                  |                   |
| <b>Questionnaire on acceptability</b>                                                                                                                                                                                                                                                    |                |                    |                                                                  |                    | X                 |
| <b>Participants who report COVID-19 symptoms on or prior to day 21;</b> will have on-site visit as soon as possible. An oropharyngeal swab will be performed, and if SARS-CoV-2 is PCR confirmed, participants will undergo a follow-up visit 14 days after symptoms onset. <sup>5</sup> |                |                    |                                                                  |                    |                   |

304

305 <sup>1</sup> Study information will be provided to participants by phone

306 <sup>2</sup> Eligibility criteria will be checked with participant by phone



1  
2  
3 307 <sup>3</sup> Informed consent will be signed by participant and medical investigator on site  
4 308 <sup>4</sup> Eligibility criteria will be confirmed  
5 309 <sup>5</sup> Participants with a positive SARS-CoV-2 swab during follow-up will be provided with  
6 310 appropriate care, as per local protocol  
7 311 <sup>6</sup> Only for participants randomized to LPV/r, as directly observed therapy for first dose  
8 312 <sup>7</sup> Only for participants randomized to LPV/r  
9 313 <sup>8</sup> Only between baseline and Day 5  
10 314 <sup>9</sup>Participants will be given the option of either a self-test DBS, or home visit by a team  
11 315 member  
12 316

14  
15 317

## 16 318 **Ethics and Dissemination**

17 319 The study (protocol v3 09.06.2020) has been approved by the following boards: Commission  
18  
19 320 Cantonale d'éthique de la Recherche, Geneva, Switzerland (2020-00864), Ethikkommission  
20  
21 321 Nordwest- und Zentralschweiz, Comitato Etico Cantonale and Swissmedic (Swiss Agency for  
22  
23 322 Therapeutic Products).

24  
25 323 All participants will be asked for written informed consent with a dedicated member of the  
26  
27 324 research team. This trial will be conducted in accordance to Good Clinical Practice and the  
28  
29 325 Helsinki Declaration. The WHO Trial Registration Data Set is in online supplementary  
30  
31 326 appendix 2.

32  
33  
34 327 The COPEP-trial will establish whether LPV/r is effective as post-exposure  
35  
36 328 chemoprophylaxis against clinical COVID-19 and / or SARS-CoV-2 infection compared to  
37  
38 329 surveillance amongst asymptomatic individuals with recent contact to a person infected with  
39  
40 330 SARS-CoV-2. Furthermore, this trial will aim to investigate whether LPV/r reduces the severity  
41  
42 331 of clinical COVID-19 over surveillance alone, and whether these prophylaxes are safe and  
43  
44 332 acceptable for post-exposure prophylaxis of SARS-CoV-2 and COVID-19.

45  
46 333 If effective, such a pragmatic approach with prescription the same day and without waiting  
47  
48 334 for laboratory results, will provide a feasible and relatively low-cost strategy to contain local  
49  
50 335 COVID-19 outbreaks in future. All results will be disseminated in peer-reviewed journals and  
51  
52 336 national and international conferences.

53  
54  
55 337

56  
57  
58  
59 338 **Fig 1. CONSORT Flow Diagram.**

1  
2  
3 339

4  
5 340 **Funding:** Fondation privée des HUG (no grant number), Swiss National Fund (project  
6  
7 341 number: 33IC30\_166819)

8  
9 342

10  
11 343 **Role of funding source:** The sponsor of the study had no role in study design, data  
12  
13 344 collection, data analysis, data interpretation, or writing of the report. The corresponding  
14  
15 345 author had full access to all the data in the study and had final responsibility for the decision  
16  
17 346 to submit for publication.

18  
19  
20 347

21  
22 348 **Author Contributions:**

23  
24 349 AC and NL conceived the overall trial, including the overall design and therapeutic  
25  
26 350 candidates and are the PI and Co-PI. AC, NL, MS, TP, MPS, and AM designed the trial,  
27  
28 351 including decision on intervention dosage and administration, study endpoints and  
29  
30 352 procedures. MS and TP developed all statistical aspects of the trial design. MS will perform  
31  
32 353 the analysing the trial data, with the support of TP. DL and SF contributed to the formulation  
33  
34 354 of recruitment via the cantonal health authorities, together with MB and CS. AM and DA  
35  
36 355 developed the patient and laboratory pathways. BM, LK, and LD helped with all laboratory  
37  
38 356 aspects of the trial design. MS wrote the first draft of this manuscript. GJN, SR, AM, MPS,  
39  
40 357 NL and AC are the study physicians and together with FJ, TA, HS, JS, MB, IG, FC who  
41  
42 358 manage the respective COVID-19 patients or infectious diseases unit contributed to the  
43  
44 359 patient pathway. All authors contributed to the re-drafting of the manuscript and in the  
45  
46 360 process of approving the final draft.

47  
48  
49 361

50  
51 362 **Conflicts of interest:** We declare that we have no conflicts of interests.

52  
53 363

54  
55 364 **Acknowledgements:** The authors thank the funders for supporting this work.

56  
57 365

58  
59 366 **References**

- 1  
2  
3 367 1. European AIDS Clinical Society. *Guidelines*.  
4  
5 368 [http://www.europeanaidsclicalsociety.org/index.php?option=com\\_content&view=article](http://www.europeanaidsclicalsociety.org/index.php?option=com_content&view=article)  
6  
7 369 [&id=59&Itemid=41](http://www.europeanaidsclicalsociety.org/index.php?option=com_content&view=article&id=59&Itemid=41) (2019).  
8  
9 370 2. World Health Organization. WHO | Antiretroviral therapy for HIV infection in adults and  
10  
11 371 adolescents. <http://www.who.int/hiv/pub/arv/adult/en/index.html>.  
12  
13 372 3. Anand, K. *et al*. Structure of coronavirus main proteinase reveals combination of a  
14  
15 373 chymotrypsin fold with an extra  $\alpha$ -helical domain. *The EMBO Journal* **21**, 3213–3224  
16  
17 374 (2002).  
18  
19 375 4. Lin, C.-W. *et al*. Characterization of trans- and cis-cleavage activity of the SARS  
20  
21 376 coronavirus 3CLpro protease: basis for the in vitro screening of anti-SARS drugs. *FEBS*  
22  
23 377 *Letters* **574**, 131–137 (2004).  
24  
25 378 5. Harrison, C. Coronavirus puts drug repurposing on the fast track. *Nature Biotechnology*  
26  
27 379 (2020) doi:10.1038/d41587-020-00003-1.  
28  
29 380 6. World Health Organization. WHO | WHO Model Lists of Essential Medicines. *WHO*  
30  
31 381 <http://www.who.int/medicines/publications/essentialmedicines/en/>.  
32  
33 382

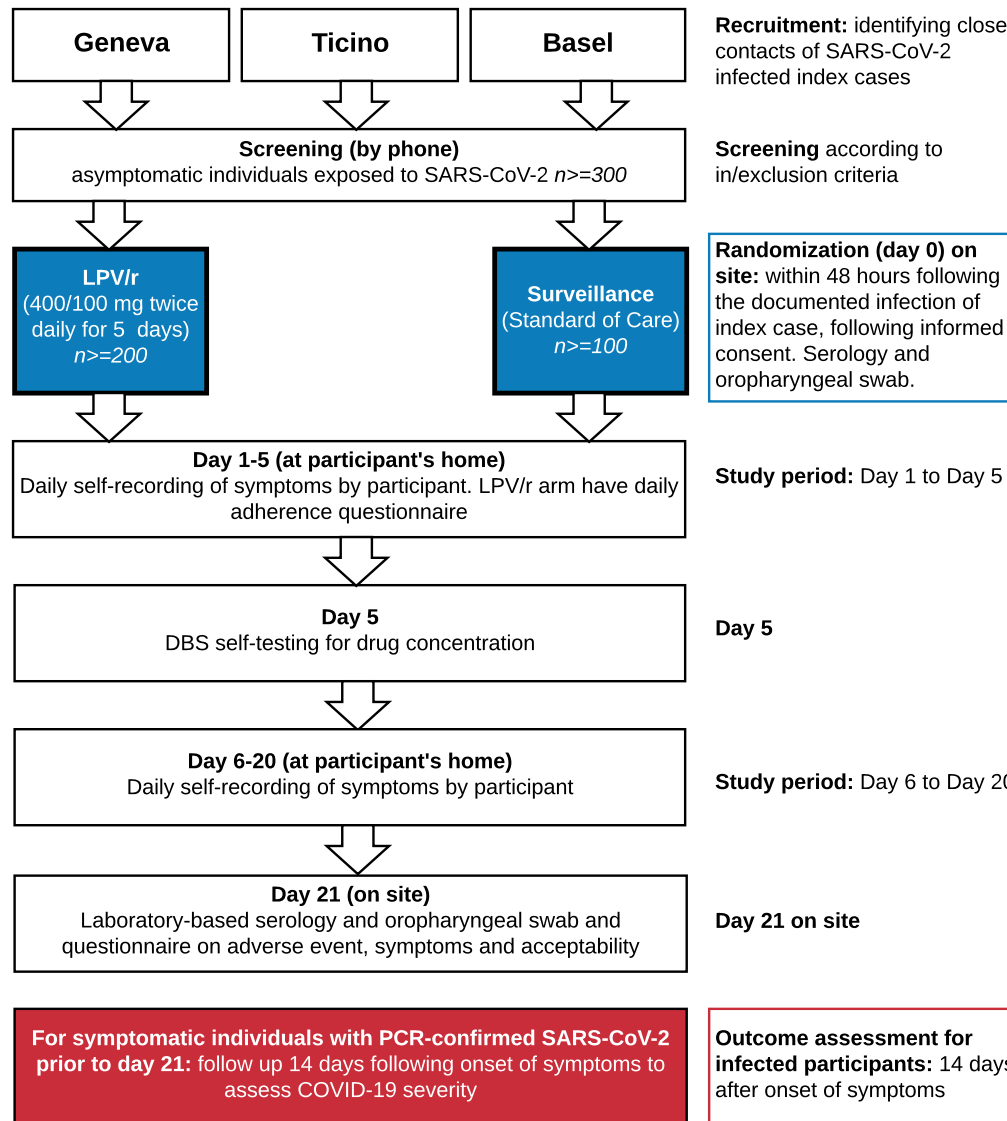

# Reporting checklist for protocol of a clinical trial.

Based on the SPIRIT guidelines.

## Instructions to authors

Complete this checklist by entering the page numbers from your manuscript where readers will find each of the items listed below.

Your article may not currently address all the items on the checklist. Please modify your text to include the missing information. If you are certain that an item does not apply, please write "n/a" and provide a short explanation.

Upload your completed checklist as an extra file when you submit to a journal.

In your methods section, say that you used the SPIRIT reporting guidelines, and cite them as:

Chan A-W, Tetzlaff JM, Altman DG, Laupacis A, Gøtzsche PC, Krleža-Jerić K, Hróbjartsson A, Mann H, Dickersin K, Berlin J, Doré C, Parulekar W, Summerskill W, Groves T, Schulz K, Sox H, Rockhold FW, Rennie D, Moher D. SPIRIT 2013 Statement: Defining standard protocol items for clinical trials. *Ann Intern Med.* 2013;158(3):200-207

|                                   |                     | Reporting Item                                                                                               | Page Number |
|-----------------------------------|---------------------|--------------------------------------------------------------------------------------------------------------|-------------|
| <b>Administrative information</b> |                     |                                                                                                              |             |
| Title                             | <a href="#">#1</a>  | Descriptive title identifying the study design, population, interventions, and, if applicable, trial acronym | 1,2         |
| Trial registration                | <a href="#">#2a</a> | Trial identifier and registry name. If not yet registered, name of intended registry                         | 2, 4        |
| Trial registration: data set      | <a href="#">#2b</a> | All items from the World Health Organization Trial Registration Data Set                                     | 15          |
| Protocol version                  | <a href="#">#3</a>  | Date and version identifier                                                                                  | 15          |
| Funding                           | <a href="#">#4</a>  | Sources and types of financial, material, and other support                                                  | 16          |

|    |                      |                     |                                                          |      |
|----|----------------------|---------------------|----------------------------------------------------------|------|
| 1  | Roles and            | <a href="#">#5a</a> | Names, affiliations, and roles of protocol contributors  | 1,16 |
| 2  | responsibilities:    |                     |                                                          |      |
| 3  | contributorship      |                     |                                                          |      |
| 4  |                      |                     |                                                          |      |
| 5  |                      |                     |                                                          |      |
| 6  | Roles and            | <a href="#">#5b</a> | Name and contact information for the trial sponsor       | ICF  |
| 7  | responsibilities:    |                     |                                                          |      |
| 8  | sponsor contact      |                     |                                                          |      |
| 9  | information          |                     |                                                          |      |
| 10 |                      |                     |                                                          |      |
| 11 |                      |                     |                                                          |      |
| 12 |                      |                     |                                                          |      |
| 13 | Roles and            | <a href="#">#5c</a> | Role of study sponsor and funders, if any, in study      | 16   |
| 14 | responsibilities:    |                     | design; collection, management, analysis, and            |      |
| 15 | sponsor and funder   |                     | interpretation of data; writing of the report; and the   |      |
| 16 |                      |                     | decision to submit the report for publication, including |      |
| 17 |                      |                     | whether they will have ultimate authority over any of    |      |
| 18 |                      |                     | these activities                                         |      |
| 19 |                      |                     |                                                          |      |
| 20 |                      |                     |                                                          |      |
| 21 |                      |                     |                                                          |      |
| 22 |                      |                     |                                                          |      |
| 23 | Roles and            | <a href="#">#5d</a> | Composition, roles, and responsibilities of the          | NA   |
| 24 | responsibilities:    |                     | coordinating centre, steering committee, endpoint        |      |
| 25 | committees           |                     | adjudication committee, data management team, and        |      |
| 26 |                      |                     | other individuals or groups overseeing the trial, if     |      |
| 27 |                      |                     | applicable (see Item 21a for data monitoring             |      |
| 28 |                      |                     | committee)                                               |      |
| 29 |                      |                     |                                                          |      |
| 30 |                      |                     |                                                          |      |
| 31 |                      |                     |                                                          |      |
| 32 |                      |                     |                                                          |      |
| 33 | <b>Introduction</b>  |                     |                                                          |      |
| 34 |                      |                     |                                                          |      |
| 35 | Background and       | <a href="#">#6a</a> | Description of research question and justification for   | 6    |
| 36 | rationale            |                     | undertaking the trial, including summary of relevant     |      |
| 37 |                      |                     | studies (published and unpublished) examining            |      |
| 38 |                      |                     | benefits and harms for each intervention                 |      |
| 39 |                      |                     |                                                          |      |
| 40 |                      |                     |                                                          |      |
| 41 |                      |                     |                                                          |      |
| 42 | Background and       | <a href="#">#6b</a> | Explanation for choice of comparators                    | 6    |
| 43 | rationale: choice of |                     |                                                          |      |
| 44 | comparators          |                     |                                                          |      |
| 45 |                      |                     |                                                          |      |
| 46 |                      |                     |                                                          |      |
| 47 | Objectives           | <a href="#">#7</a>  | Specific objectives or hypotheses                        | 6    |
| 48 |                      |                     |                                                          |      |
| 49 | Trial design         | <a href="#">#8</a>  | Description of trial design including type of trial (eg, | 6    |
| 50 |                      |                     | parallel group, crossover, factorial, single group),     |      |
| 51 |                      |                     | allocation ratio, and framework (eg, superiority,        |      |
| 52 |                      |                     | equivalence, non-inferiority, exploratory)               |      |
| 53 |                      |                     |                                                          |      |
| 54 |                      |                     |                                                          |      |
| 55 |                      |                     |                                                          |      |

**Methods:**  
**Participants,**

## interventions, and outcomes

|    |                                    |                      |                                                                                                                                                                                                                                                                                                                                                                                |       |
|----|------------------------------------|----------------------|--------------------------------------------------------------------------------------------------------------------------------------------------------------------------------------------------------------------------------------------------------------------------------------------------------------------------------------------------------------------------------|-------|
| 1  |                                    |                      |                                                                                                                                                                                                                                                                                                                                                                                |       |
| 2  |                                    |                      |                                                                                                                                                                                                                                                                                                                                                                                |       |
| 3  |                                    |                      |                                                                                                                                                                                                                                                                                                                                                                                |       |
| 4  | Study setting                      | <a href="#">#9</a>   | Description of study settings (eg, community clinic, academic hospital) and list of countries where data will be collected. Reference to where list of study sites can be obtained                                                                                                                                                                                             | 7     |
| 5  |                                    |                      |                                                                                                                                                                                                                                                                                                                                                                                |       |
| 6  |                                    |                      |                                                                                                                                                                                                                                                                                                                                                                                |       |
| 7  |                                    |                      |                                                                                                                                                                                                                                                                                                                                                                                |       |
| 8  |                                    |                      |                                                                                                                                                                                                                                                                                                                                                                                |       |
| 9  |                                    |                      |                                                                                                                                                                                                                                                                                                                                                                                |       |
| 10 |                                    |                      |                                                                                                                                                                                                                                                                                                                                                                                |       |
| 11 | Eligibility criteria               | <a href="#">#10</a>  | Inclusion and exclusion criteria for participants. If applicable, eligibility criteria for study centres and individuals who will perform the interventions (eg, surgeons, psychotherapists)                                                                                                                                                                                   | 7-8   |
| 12 |                                    |                      |                                                                                                                                                                                                                                                                                                                                                                                |       |
| 13 |                                    |                      |                                                                                                                                                                                                                                                                                                                                                                                |       |
| 14 |                                    |                      |                                                                                                                                                                                                                                                                                                                                                                                |       |
| 15 |                                    |                      |                                                                                                                                                                                                                                                                                                                                                                                |       |
| 16 |                                    |                      |                                                                                                                                                                                                                                                                                                                                                                                |       |
| 17 | Interventions:<br>description      | <a href="#">#11a</a> | Interventions for each group with sufficient detail to allow replication, including how and when they will be administered                                                                                                                                                                                                                                                     | 8     |
| 18 |                                    |                      |                                                                                                                                                                                                                                                                                                                                                                                |       |
| 19 |                                    |                      |                                                                                                                                                                                                                                                                                                                                                                                |       |
| 20 |                                    |                      |                                                                                                                                                                                                                                                                                                                                                                                |       |
| 21 |                                    |                      |                                                                                                                                                                                                                                                                                                                                                                                |       |
| 22 |                                    |                      |                                                                                                                                                                                                                                                                                                                                                                                |       |
| 23 | Interventions:<br>modifications    | <a href="#">#11b</a> | Criteria for discontinuing or modifying allocated interventions for a given trial participant (eg, drug dose change in response to harms, participant request, or improving / worsening disease)                                                                                                                                                                               | NA    |
| 24 |                                    |                      |                                                                                                                                                                                                                                                                                                                                                                                |       |
| 25 |                                    |                      |                                                                                                                                                                                                                                                                                                                                                                                |       |
| 26 |                                    |                      |                                                                                                                                                                                                                                                                                                                                                                                |       |
| 27 |                                    |                      |                                                                                                                                                                                                                                                                                                                                                                                |       |
| 28 |                                    |                      |                                                                                                                                                                                                                                                                                                                                                                                |       |
| 29 |                                    |                      |                                                                                                                                                                                                                                                                                                                                                                                |       |
| 30 | Interventions:<br>adherence        | <a href="#">#11c</a> | Strategies to improve adherence to intervention protocols, and any procedures for monitoring adherence (eg, drug tablet return; laboratory tests)                                                                                                                                                                                                                              | 10-11 |
| 31 |                                    |                      |                                                                                                                                                                                                                                                                                                                                                                                |       |
| 32 |                                    |                      |                                                                                                                                                                                                                                                                                                                                                                                |       |
| 33 |                                    |                      |                                                                                                                                                                                                                                                                                                                                                                                |       |
| 34 |                                    |                      |                                                                                                                                                                                                                                                                                                                                                                                |       |
| 35 | Interventions:<br>concomitant care | <a href="#">#11d</a> | Relevant concomitant care and interventions that are permitted or prohibited during the trial                                                                                                                                                                                                                                                                                  | 7-8   |
| 36 |                                    |                      |                                                                                                                                                                                                                                                                                                                                                                                |       |
| 37 |                                    |                      |                                                                                                                                                                                                                                                                                                                                                                                |       |
| 38 |                                    |                      |                                                                                                                                                                                                                                                                                                                                                                                |       |
| 39 | Outcomes                           | <a href="#">#12</a>  | Primary, secondary, and other outcomes, including the specific measurement variable (eg, systolic blood pressure), analysis metric (eg, change from baseline, final value, time to event), method of aggregation (eg, median, proportion), and time point for each outcome. Explanation of the clinical relevance of chosen efficacy and harm outcomes is strongly recommended | 8-9   |
| 40 |                                    |                      |                                                                                                                                                                                                                                                                                                                                                                                |       |
| 41 |                                    |                      |                                                                                                                                                                                                                                                                                                                                                                                |       |
| 42 |                                    |                      |                                                                                                                                                                                                                                                                                                                                                                                |       |
| 43 |                                    |                      |                                                                                                                                                                                                                                                                                                                                                                                |       |
| 44 |                                    |                      |                                                                                                                                                                                                                                                                                                                                                                                |       |
| 45 |                                    |                      |                                                                                                                                                                                                                                                                                                                                                                                |       |
| 46 |                                    |                      |                                                                                                                                                                                                                                                                                                                                                                                |       |
| 47 |                                    |                      |                                                                                                                                                                                                                                                                                                                                                                                |       |
| 48 |                                    |                      |                                                                                                                                                                                                                                                                                                                                                                                |       |
| 49 |                                    |                      |                                                                                                                                                                                                                                                                                                                                                                                |       |
| 50 | Participant timeline               | <a href="#">#13</a>  | Time schedule of enrolment, interventions (including any run-ins and washouts), assessments, and visits for participants. A schematic diagram is highly recommended (see Figure)                                                                                                                                                                                               | 10-11 |
| 51 |                                    |                      |                                                                                                                                                                                                                                                                                                                                                                                |       |
| 52 |                                    |                      |                                                                                                                                                                                                                                                                                                                                                                                |       |
| 53 |                                    |                      |                                                                                                                                                                                                                                                                                                                                                                                |       |
| 54 |                                    |                      |                                                                                                                                                                                                                                                                                                                                                                                |       |
| 55 |                                    |                      |                                                                                                                                                                                                                                                                                                                                                                                |       |
| 56 |                                    |                      |                                                                                                                                                                                                                                                                                                                                                                                |       |
| 57 | Sample size                        | <a href="#">#14</a>  | Estimated number of participants needed to achieve study objectives and how it was determined, including                                                                                                                                                                                                                                                                       | 11    |
| 58 |                                    |                      |                                                                                                                                                                                                                                                                                                                                                                                |       |
| 59 |                                    |                      |                                                                                                                                                                                                                                                                                                                                                                                |       |
| 60 |                                    |                      |                                                                                                                                                                                                                                                                                                                                                                                |       |

clinical and statistical assumptions supporting any sample size calculations

1  
2  
3  
4 Recruitment [#15](#) Strategies for achieving adequate participant enrolment to reach target sample size 10-11  
5  
6

7  
8 **Methods:**  
9 **Assignment of**  
10 **interventions (for**  
11 **controlled trials)**  
12  
13

14 Allocation: sequence [#16a](#) Method of generating the allocation sequence (eg, 12  
15 generation computer-generated random numbers), and list of any  
16 factors for stratification. To reduce predictability of a  
17 random sequence, details of any planned restriction  
18 (eg, blocking) should be provided in a separate  
19 document that is unavailable to those who enrol  
20 participants or assign interventions  
21  
22  
23  
24

25 Allocation [#16b](#) Mechanism of implementing the allocation sequence 12  
26 concealment (eg, central telephone; sequentially numbered,  
27 opaque, sealed envelopes), describing any steps to  
28 conceal the sequence until interventions are assigned  
29 mechanism  
30  
31

32 Allocation: [#16c](#) Who will generate the allocation sequence, who will 12  
33 implementation enrol participants, and who will assign participants to  
34 interventions  
35  
36  
37

38 Blinding (masking) [#17a](#) Who will be blinded after assignment to interventions NA  
39 (eg, trial participants, care providers, outcome  
40 assessors, data analysts), and how  
41  
42

43 Blinding (masking): [#17b](#) If blinded, circumstances under which unblinding is NA  
44 emergency permissible, and procedure for revealing a  
45 unblinding participant's allocated intervention during the trial  
46  
47

48 **Methods: Data**  
49 **collection,**  
50 **management, and**  
51 **analysis**  
52  
53  
54

55 Data collection plan [#18a](#) Plans for assessment and collection of outcome, 13-14  
56 baseline, and other trial data, including any related  
57 processes to promote data quality (eg, duplicate  
58  
59  
60



measurements, training of assessors) and a description of study instruments (eg, questionnaires, laboratory tests) along with their reliability and validity, if known. Reference to where data collection forms can be found, if not in the protocol

1  
2  
3  
4  
5  
6  
7  
8  
9 Data collection plan: [#18b](#) Plans to promote participant retention and complete 13-14  
10 retention  
11 follow-up, including list of any outcome data to be  
12 collected for participants who discontinue or deviate  
13 from intervention protocols

14  
15 Data management [#19](#) Plans for data entry, coding, security, and storage, 13-14  
16 including any related processes to promote data  
17 quality (eg, double data entry; range checks for data  
18 values). Reference to where details of data  
19 management procedures can be found, if not in the  
20 protocol  
21  
22  
23  
24

25 Statistics: outcomes [#20a](#) Statistical methods for analysing primary and 12-13  
26 secondary outcomes. Reference to where other  
27 details of the statistical analysis plan can be found, if  
28 not in the protocol  
29  
30

31  
32 Statistics: additional [#20b](#) Methods for any additional analyses (eg, subgroup 12-13  
33 analyses and adjusted analyses)  
34

35  
36 Statistics: analysis [#20c](#) Definition of analysis population relating to protocol 12-13  
37 population and  
38 missing data non-adherence (eg, as randomised analysis), and any  
39 statistical methods to handle missing data (eg,  
40 multiple imputation)  
41

## 42 **Methods:**

### 43 **Monitoring**

44  
45  
46 Data monitoring: [#21a](#) Composition of data monitoring committee (DMC); NA  
47 formal committee summary of its role and reporting structure; statement  
48 of whether it is independent from the sponsor and  
49 competing interests; and reference to where further  
50 details about its charter can be found, if not in the  
51 protocol. Alternatively, an explanation of why a DMC  
52 is not needed  
53  
54  
55  
56  
57  
58  
59  
60

|    |                      |                      |                                                         |        |
|----|----------------------|----------------------|---------------------------------------------------------|--------|
| 1  | Data monitoring:     | <a href="#">#21b</a> | Description of any interim analyses and stopping        | NA     |
| 2  | interim analysis     |                      | guidelines, including who will have access to these     |        |
| 3  |                      |                      | interim results and make the final decision to          |        |
| 4  |                      |                      | terminate the trial                                     |        |
| 5  |                      |                      |                                                         |        |
| 6  |                      |                      |                                                         |        |
| 7  |                      |                      |                                                         |        |
| 8  | Harms                | <a href="#">#22</a>  | Plans for collecting, assessing, reporting, and         | 13-z14 |
| 9  |                      |                      | managing solicited and spontaneously reported           |        |
| 10 |                      |                      | adverse events and other unintended effects of trial    |        |
| 11 |                      |                      | interventions or trial conduct                          |        |
| 12 |                      |                      |                                                         |        |
| 13 |                      |                      |                                                         |        |
| 14 | Auditing             | <a href="#">#23</a>  | Frequency and procedures for auditing trial conduct, if | NA     |
| 15 |                      |                      | any, and whether the process will be independent        |        |
| 16 |                      |                      | from investigators and the sponsor                      |        |
| 17 |                      |                      |                                                         |        |
| 18 |                      |                      |                                                         |        |
| 19 |                      |                      |                                                         |        |
| 20 | <b>Ethics and</b>    |                      |                                                         |        |
| 21 | <b>dissemination</b> |                      |                                                         |        |
| 22 |                      |                      |                                                         |        |
| 23 |                      |                      |                                                         |        |
| 24 | Research ethics      | <a href="#">#24</a>  | Plans for seeking research ethics committee /           | 15     |
| 25 | approval             |                      | institutional review board (REC / IRB) approval         |        |
| 26 |                      |                      |                                                         |        |
| 27 | Protocol amendments  | <a href="#">#25</a>  | Plans for communicating important protocol              | NA     |
| 28 |                      |                      | modifications (eg, changes to eligibility criteria,     |        |
| 29 |                      |                      | outcomes, analyses) to relevant parties (eg,            |        |
| 30 |                      |                      | investigators, REC / IRBs, trial participants, trial    |        |
| 31 |                      |                      | registries, journals, regulators)                       |        |
| 32 |                      |                      |                                                         |        |
| 33 |                      |                      |                                                         |        |
| 34 |                      |                      |                                                         |        |
| 35 |                      |                      |                                                         |        |
| 36 | Consent or assent    | <a href="#">#26a</a> | Who will obtain informed consent or assent from         | 15     |
| 37 |                      |                      | potential trial participants or authorised surrogates,  |        |
| 38 |                      |                      | and how (see Item 32)                                   |        |
| 39 |                      |                      |                                                         |        |
| 40 |                      |                      |                                                         |        |
| 41 | Consent or assent:   | <a href="#">#26b</a> | Additional consent provisions for collection and use of | NA     |
| 42 | ancillary studies    |                      | participant data and biological specimens in ancillary  |        |
| 43 |                      |                      | studies, if applicable                                  |        |
| 44 |                      |                      |                                                         |        |
| 45 |                      |                      |                                                         |        |
| 46 | Confidentiality      | <a href="#">#27</a>  | How personal information about potential and enrolled   | 13-14  |
| 47 |                      |                      | participants will be collected, shared, and maintained  |        |
| 48 |                      |                      | in order to protect confidentiality before, during, and |        |
| 49 |                      |                      | after the trial                                         |        |
| 50 |                      |                      |                                                         |        |
| 51 |                      |                      |                                                         |        |
| 52 |                      |                      |                                                         |        |
| 53 | Declaration of       | <a href="#">#28</a>  | Financial and other competing interests for principal   | 16     |
| 54 | interests            |                      | investigators for the overall trial and each study site |        |
| 55 |                      |                      |                                                         |        |
| 56 |                      |                      |                                                         |        |
| 57 |                      |                      |                                                         |        |
| 58 |                      |                      |                                                         |        |
| 59 |                      |                      |                                                         |        |
| 60 |                      |                      |                                                         |        |

|    |                       |                      |                                                                                                                                                                                                                                                                                     |            |
|----|-----------------------|----------------------|-------------------------------------------------------------------------------------------------------------------------------------------------------------------------------------------------------------------------------------------------------------------------------------|------------|
| 1  | Data access           | <a href="#">#29</a>  | Statement of who will have access to the final trial dataset, and disclosure of contractual agreements that limit such access for investigators                                                                                                                                     | 13-14      |
| 2  |                       |                      |                                                                                                                                                                                                                                                                                     |            |
| 3  |                       |                      |                                                                                                                                                                                                                                                                                     |            |
| 4  |                       |                      |                                                                                                                                                                                                                                                                                     |            |
| 5  |                       |                      |                                                                                                                                                                                                                                                                                     |            |
| 6  | Ancillary and post    | <a href="#">#30</a>  | Provisions, if any, for ancillary and post-trial care, and for compensation to those who suffer harm from trial participation                                                                                                                                                       | NA         |
| 7  | trial care            |                      |                                                                                                                                                                                                                                                                                     |            |
| 8  |                       |                      |                                                                                                                                                                                                                                                                                     |            |
| 9  |                       |                      |                                                                                                                                                                                                                                                                                     |            |
| 10 |                       |                      |                                                                                                                                                                                                                                                                                     |            |
| 11 | Dissemination policy: | <a href="#">#31a</a> | Plans for investigators and sponsor to communicate trial results to participants, healthcare professionals, the public, and other relevant groups (eg, via publication, reporting in results databases, or other data sharing arrangements), including any publication restrictions | 15         |
| 12 | trial results         |                      |                                                                                                                                                                                                                                                                                     |            |
| 13 |                       |                      |                                                                                                                                                                                                                                                                                     |            |
| 14 |                       |                      |                                                                                                                                                                                                                                                                                     |            |
| 15 |                       |                      |                                                                                                                                                                                                                                                                                     |            |
| 16 |                       |                      |                                                                                                                                                                                                                                                                                     |            |
| 17 |                       |                      |                                                                                                                                                                                                                                                                                     |            |
| 18 |                       |                      |                                                                                                                                                                                                                                                                                     |            |
| 19 |                       |                      |                                                                                                                                                                                                                                                                                     |            |
| 20 |                       |                      |                                                                                                                                                                                                                                                                                     |            |
| 21 | Dissemination policy: | <a href="#">#31b</a> | Authorship eligibility guidelines and any intended use of professional writers                                                                                                                                                                                                      | NA         |
| 22 | authorship            |                      |                                                                                                                                                                                                                                                                                     |            |
| 23 |                       |                      |                                                                                                                                                                                                                                                                                     |            |
| 24 |                       |                      |                                                                                                                                                                                                                                                                                     |            |
| 25 | Dissemination policy: | <a href="#">#31c</a> | Plans, if any, for granting public access to the full protocol, participant-level dataset, and statistical code                                                                                                                                                                     | NA         |
| 26 | reproducible research |                      |                                                                                                                                                                                                                                                                                     |            |
| 27 |                       |                      |                                                                                                                                                                                                                                                                                     |            |
| 28 |                       |                      |                                                                                                                                                                                                                                                                                     |            |
| 29 | <b>Appendices</b>     |                      |                                                                                                                                                                                                                                                                                     |            |
| 30 |                       |                      |                                                                                                                                                                                                                                                                                     |            |
| 31 | Informed consent      | <a href="#">#32</a>  | Model consent form and other related documentation given to participants and authorised surrogates                                                                                                                                                                                  | Supplement |
| 32 | materials             |                      |                                                                                                                                                                                                                                                                                     |            |
| 33 |                       |                      |                                                                                                                                                                                                                                                                                     |            |
| 34 |                       |                      |                                                                                                                                                                                                                                                                                     |            |
| 35 | Biological specimens  | <a href="#">#33</a>  | Plans for collection, laboratory evaluation, and storage of biological specimens for genetic or molecular analysis in the current trial and for future use in ancillary studies, if applicable                                                                                      | NA         |
| 36 |                       |                      |                                                                                                                                                                                                                                                                                     |            |
| 37 |                       |                      |                                                                                                                                                                                                                                                                                     |            |
| 38 |                       |                      |                                                                                                                                                                                                                                                                                     |            |
| 39 |                       |                      |                                                                                                                                                                                                                                                                                     |            |
| 40 |                       |                      |                                                                                                                                                                                                                                                                                     |            |
| 41 |                       |                      |                                                                                                                                                                                                                                                                                     |            |

The SPIRIT checklist is distributed under the terms of the Creative Commons Attribution License CC-BY-ND 3.0. This checklist was completed on 05. May 2020 using <https://www.goodreports.org/>, a tool made by the [EQUATOR Network](#) in collaboration with [Penelope.ai](#)

Supplementary material

*BMJ Open*

**Supplement 2. The World Health Organization Trial Registration Data Set for the COPEP trial**

**1. Primary Registry and Trial Identifying Number**

Swiss National Clinical Trial Portal (SNCTP 000003732)

**2. Date of Registration in Primary Registry**

17.04.2020

**3. Secondary Identifying Numbers**

Clinicaltrials.gov (NCT04364022);

**4. Source of Monetary or Material Support**

Fondation privée des HUG

**5. Primary Sponsor**

Fondation privée des HUG

**6. Secondary Sponsor(s)**

SNF grant submitted

**7. Contact for Public Queries**

Professeur Alexandra Calmy

Hôpitaux Universitaires de Genève (HUG)

Rue Gabrielle-Perret-Gentil 4, 1205 Genève, Switzerland

Email : [alexandra.calmy@hcuge.ch](mailto:alexandra.calmy@hcuge.ch)

**8. Contact for Scientific Queries**

Dr Mikaela Smit

Hôpitaux Universitaires de Genève (HUG)

Rue Gabrielle-Perret-Gentil 4, 1205 Genève, Switzerland

Email : [mikaela.smit@hcuge.ch](mailto:mikaela.smit@hcuge.ch)

**9. Public Title**

Médecin adjointe agréée

Director of the HIV Unite

**10. Scientific Title**

Chef de Clinique Scientifique

Epidemiologist

**11. Countries of Recruitment**

Switzerland

**12. Health Conditions(s) or Problem(s) Studied**

COVID-19

**13. Intervention(s)**

## Supplementary material

BMJ Open

Participants will be randomized in household clusters, 2:1 to receive either LPV/r, 400mg/100mg (2x 200mg/50mg pills) twice daily for 5 days; or surveillance. The first dose of LPV/r will be taken during the baseline visit, as directly observed therapy.

**14. Key Inclusion and Exclusion Criteria**

## Inclusion Criteria

1. Documented close contact with a PCR-confirmed SARS-CoV-2 positive individual;
2.  $\geq 16$  years of age;
3. Informed consent documented by signature (including parent's or legal guardian's signature if the participant is 16 and 18 y.o.);

## Exclusion Criteria

1. Fever (temperature  $>38.0^\circ$ ) and/or respiratory symptoms (cough, dyspnoea) and/or new anosmia/ageusia;
2. Individuals with previous confirmed SARS-CoV-2 infection within the last six months;
3. Known impairment of liver function;
4. Known hypersensitivity to any of the study medications;
5. Use of any medications that are contraindicated with LPV/r using the website [www.hiv-druginteractions.org/checker](http://www.hiv-druginteractions.org/checker)
6. Individuals on boosted protease inhibitor as part of an antiretroviral therapy
7. Inability to be followed-up for the trial period

**15. Study type:**

Study type: interventional

Method of allocation: randomized

Masking: open

**16. Date of First Enrollment**

23/04/20

**17. Sample Size**

300

**18. Recruitment Status**

Recruiting

**19. Primary outcomes:**

Outcome: incidence of COVID-19

Measurement:  $\geq 1$  symptom compatible with COVID-19 and either

i) a positive PCR for SARS-CoV-2 in oropharyngeal swab and/or

ii) a seroconversion of IgG only or IgG and IgA for SARS-CoV-2 at day 21 in individuals with negative serology at baseline. In case of seroconversion of IgA only, seroconversion of IgG using more sensitive spike-based recombination immunofluorescence assay (S-rIFA) will be assessed.

Timepoint: 21 days

## Supplementary material

*BMJ Open***20. Key Secondary Outcomes**

Outcome: incidence of COVID-19

Measurement: modified ITT (negative SARS-CoV-2 PCR and serology at baseline)

Timepoint: 21 days

Outcome: incidence of SARS-CoV-2

Measurement: i) a positive PCR for SARS-CoV-2 (oropharyngeal swab) amongst those with a negative PCR at baseline and/or

ii) a seroconversion of IgG only or IgG and IgA for SARS-CoV-2 at day 21 in individuals with negative serology at baseline. In case of seroconversion of IgA only, seroconversion of IgG using more sensitive S-rIFA will be used.

Timepoint: 21 days

Outcome: severity of COVID-19

Measurement: 7-point ordinal scale

Timepoint: 14 days post onset of disease, end of hospitalization where applicable

**21. Ethics review**

The study has been approved by the following boards: Commission cantonale d'éthique de la recherche, Geneva, Switzerland (2020-00864), Ethikkommission Nordwest- und Zentralschweiz, Comitato Etico Cantonale Swissmedic (Swiss Agency for Therapeutic Products).

All participants will be asked for written informed consent. This trial will be conducted in accordance to Good Clinical Practice and the Helsinki Declaration.

**22. Completion data**

N/A

**23. Summary Results:**

N/A

**24. IPD sharing statement:**

Plan to share IPD: the IPD for this trial will not be made available

Plan description: study protocol
