# Supplementary material for: Efficacy of pragmatic same-day ring prophylaxis for adult individuals exposed to SARS-CoV-2 in Switzerland (COPEP): protocol of an open-label cluster randomised trial
Source: PubMed Central journal article supplement — BMJ Open. 2020 Nov 12;10(11):e040110. doi: 10.1136/bmjopen-2020-040110 (PMC7662450; doi:10.1136/bmjopen-2020-040110), 2020-11-12
Supplement: bmjopen-2020-040110supp002.pdf [file bmjopen-2020-040110supp002.pdf]

Supplementary material

BMJ Open

## Supplement 2. The World Health Organization Trial Registration Data Set for the COPEP trial

### 1. Primary Registry and Trial Identifying Number

Swiss National Clinical Trial Portal (SNCTP 000003732)

### 2. Date of Registration in Primary Registry

17.04.2020

### 3. Secondary Identifying Numbers

Clinicaltrials.gov (NCT04364022);

### 4. Source of Monetary or Material Support

Fondation privée des HUG

### 5. Primary Sponsor

Fondation privée des HUG

### 6. Secondary Sponsor(s)

SNF grant submitted

### 7. Contact for Public Queries

Professeur Alexandra Calmy  
Hôpitaux Universitaires de Genève (HUG)  
Rue Gabrielle-Perret-Gentil 4, 1205 Genève, Switzerland  
Email : [alexandra.calmy@hcuge.ch](mailto:alexandra.calmy@hcuge.ch)

### 8. Contact for Scientific Queries

Dr Mikaela Smit  
Hôpitaux Universitaires de Genève (HUG)  
Rue Gabrielle-Perret-Gentil 4, 1205 Genève, Switzerland  
Email : [mikaela.smit@hcuge.ch](mailto:mikaela.smit@hcuge.ch)

### 9. Public Title

Médecin adjointe agrégée  
Director of the HIV Unite

### 10. Scientific Title

Chef de Clinique Scientifique  
Epidemiologist

### 11. Countries of Recruitment

Switzerland

### 12. Health Conditions(s) or Problem(s) Studied

COVID-19

### 13. Intervention(s)

## Supplementary material

BMJ Open

Participants will be randomized in household clusters, 2:1 to receive either LPV/r, 400mg/100mg (2x 200mg/50mg pills) twice daily for 5 days; or surveillance. The first dose of LPV/r will be taken during the baseline visit, as directly observed therapy.

**14. Key Inclusion and Exclusion Criteria**

## Inclusion Criteria

1. Documented close contact with a PCR-confirmed SARS-CoV-2 positive individual;
2.  $\geq 16$  years of age;
3. Informed consent documented by signature (including parent's or legal guardian's signature if the participant is 16 and 18 y.o.);

## Exclusion Criteria

1. Fever (temperature  $>38.0^{\circ}$ ) and/or respiratory symptoms (cough, dyspnoea) and/or new anosmia/ageusia;
2. Individuals with previous confirmed SARS-CoV-2 infection within the last six months;
3. Known impairment of liver function;
4. Known hypersensitivity to any of the study medications;
5. Use of any medications that are contraindicated with LPV/r using the website [www.hiv-druginteractions.org/checker](http://www.hiv-druginteractions.org/checker)
6. Individuals on boosted protease inhibitor as part of an antiretroviral therapy
7. Inability to be followed-up for the trial period

**15. Study type:**

Study type: interventional

Method of allocation: randomized

Masking: open

**16. Date of First Enrollment**

23/04/20

**17. Sample Size**

300

**18. Recuitement Status**

Recruiting

**19. Primary outcomes:**

Outcome: incidence of COVID-19

Measurement:  $\geq 1$  symptom compatible with COVID-19 and either

i) a positive PCR for SARS-CoV-2 in oropharyngeal swab and/or

ii) a seroconversion of IgG only or IgG and IgA for SARS-CoV-2 at day 21 in individuals with negative serology at baseline. In case of seroconversion of IgA only, seroconversion of IgG using more sensitive spike-based recombination immunofluorescence assay (S-rIFA) will be assessed.

Timepoint: 21 days

## Supplementary material

BMJ Open

**20. Key Secondary Outcomes**

Outcome: incidence of COVID-19

Measurement: modified ITT (negative SARS-CoV-2 PCR and serology at baseline)

Timepoint: 21 days

Outcome: incidence of SARS-CoV-2

Measurement: i) a positive PCR for SARS-CoV-2 (oropharyngeal swab) amongst those with a negative PCR at baseline and/or

ii) a seroconversion of IgG only or IgG and IgA for SARS-CoV-2 at day 21 in individuals with negative serology at baseline. In case of seroconversion of IgA only, seroconversion of IgG using more sensitive S-rIFA will be used.

Timepoint: 21 days

Outcome: severity of COVID-19

Measurement: 7-point ordinal scale

Timepoint: 14 days post onset of disease, end of hospitalization where applicable

**21. Ethics review**

The study has been approved by the following boards: Commission cantonale d'éthique de la recherche, Geneva, Switzerland (2020-00864), Ethikkommission Nordwest- und Zentralschweiz, Comitato Etico Cantonale Swissmedic (Swiss Agency for Therapeutic Products).

All participants will be asked for written informed consent. This trial will be conducted in accordance to Good Clinical Practice and the Helsinki Declaration.

**22. Completion data**

N/A

**23. Summary Results:**

N/A

**24. IPD sharing statement:**

Plan to share IPD: the IPD for this trial will not be made available

Plan description: study protocol
